1 **miR-467 regulates inflammation and blood insulin and glucose**

2 Jasmine Gajeton<sup>1,2</sup>, Irene Krukovets<sup>1</sup>, Revanth Yendamuri<sup>1,4</sup>, Dmitry Verbovetskiy<sup>1</sup>,

3 Amit Vasanji<sup>3</sup>, Lidiya Sul<sup>1,5</sup>, Olga Stenina-Adognravi<sup>1,2</sup>

4 <sup>1</sup>Department of Cardiovascular and Metabolic Sciences,

5 Cleveland Clinic, Cleveland, OH

6 <sup>2</sup>Department of Molecular Medicine, Case Western Reserve University, Cleveland, OH

7 <sup>3</sup>ERT Imaging, Cleveland, OH

8 **Short running title:** miR-467 prevents insulin resistance

9 **Address correspondence to:**

10 Olga Stenina-Adognravi

11 Department of Cardiovascular and Metabolic Sciences, Cleveland Clinic

12 9500 Euclid Ave NB50-78, Cleveland, OH 44195, USA

13 (216) 444-9057

14 [stenino@ccf.org](mailto:stenino@ccf.org)

15 **Word count: 4,841**

16 **Abstract: 200**

17 **References: 53**

18 **Figures: 7**

19

20

<sup>4</sup> Current address: Northeast Ohio Medical University, 4209 St, OH-44, Rootstown, OH 44272

<sup>5</sup> Current address: Ohio University Heritage College of Osteopathic Medicine, 35 W Green Dr, Athens, OH 45701

## Abstract

2 Obesity is associated with inflammation and insulin resistance (IR), but the regulation  
3 of insulin sensitivity (IS) and connections between IS and inflammation remain unclear.  
4 We investigated the role of miR-467a-5p, a miRNA induced by hyperglycemia, in  
5 regulating inflammation and blood glucose handling.  
6 We previously demonstrated that miR-467a-5p is induced by hyperglycemia and  
7 inhibits the production of thrombospondin-1 (TSP-1), a protein implicated in regulating  
8 inflammation. To investigate the role of miR-467 in blood glucose handling and tissue  
9 inflammation, WT C57/BL6 mice were fed chow or Western diet from 5 to 32 weeks of  
10 age and injected weekly with miR-467a-5p antagonist. Inhibiting miR-467a-5p resulted  
11 in 47% increase in macrophage infiltration and increased *Il6* levels in adipose tissue,  
12 higher plasma insulin levels (98 vs 63 ng/mL), and 17% decrease in glucose clearance  
13 without increase in weight or HDL/LDL. The antagonist effect was lost in mice on  
14 Western diet. Mice lacking TSP-1 lost some but not all of the miR-467 effects,  
15 suggesting *Thbs1*<sup>-/-</sup> (and other unknown transcripts) are targeted by miR-467 to  
16 regulate inflammation.  
17 miR-467a-5p provides a physiological feedback when blood glucose is elevated to  
18 avoid inflammation and increased blood glucose and insulin levels, which may prevent  
19 IR.

20

21

22 **Keywords:** microRNA/miR-467a-5p, inflammation, macrophages, insulin resistance

23

## 1 1. INTRODUCTION

2 Genome-wide analyses have uncovered important roles of microRNAs in the  
3 pathogenesis of diabetes mellitus <sup>1</sup>, including evidence to suggest a tight regulation  
4 between microRNAs, glucose metabolism, and inflammation <sup>2-4</sup>. The expression of  
5 microRNAs can be further altered by a variety of stressors, e.g., changes in blood  
6 glucose or pro-inflammatory cytokines <sup>5</sup>; regulation of miRNAs adds another layer of  
7 complexity in regulating targets. Diet-induced obesity and increased blood glucose  
8 levels correlate with chronic inflammation and development of IR <sup>6-14</sup>. However, the  
9 sequence and causality of pathological changes leading to IR, including naturally  
10 occurring feedback mechanisms preventing the transition to IR in response to elevated  
11 blood glucose, are poorly understood.

12 Macrophage infiltration in adipose tissue is thought to be a main contributor in  
13 promoting chronic inflammation and development of IR. Islet inflammation promotes  
14 impaired  $\beta$ -cell function and subsequent failure, which occurs before the onset of type 2  
15 diabetes (T2D) <sup>15-17</sup>. Thrombospondin-1 is an extracellular matrix protein involved in  
16 regulation of tissue remodeling and inflammation. Studies in *Thbs1*<sup>-/-</sup> mice suggest that  
17 a lack of TSP-1 may alleviate macrophage accumulation and the pro-inflammatory  
18 phenotype observed in insulin resistant metabolic organs, thus protecting the animals  
19 from diet-induced inflammation and IR <sup>18-20</sup>.

20 We recently reported that miR-467a-5p is rapidly upregulated by high glucose *in vitro*  
21 and *in vivo* and regulates angiogenesis by targeting *Thbs1* mRNA <sup>21-24</sup>. Others report  
22 this miRNA prevents vascular inflammation by targeting Lipoprotein Lipase in  
23 macrophages <sup>21,22,25-28</sup>. Yet, the physiological function of miR-467a-5p and the

1 physiological significance of its rapid upregulation by hyperglycemia remained unknown.  
2 In this work, the effects of a miR-467 antagonist on blood glucose and insulin levels and  
3 inflammation in adipose tissue and pancreas were examined in wild type (WT) and  
4 *Thbs1*<sup>-/-</sup> mice to understand the role of miR-467a-5p and its target, TSP-1, in regulating  
5 inflammation in tissues and in blood glucose handling.  
6

## 1 **2. MATERIALS AND METHODS**

2 Detailed description of methods is provided in the Online Supplement.

### 3 **2.1 Experimental animals**

4 Animal procedures were approved by IACUC. Male WT C57BL6 (n=10/group) or *Thbs1*<sup>-/-</sup> (n=7/group) mice were fed a chow or Western diet (TD.88137, 40-45% kcal from fat, 5 34% sucrose by weight, Envigo) starting at 4 weeks of age and injected weekly with a 6 miR-467a-5p antagonist (2.5 mg/kg body weight) (or a control oligonucleotide with no 7 predicted targets in mouse or human genomes<sup>22,29</sup>), intraperitoneally, starting at 5 8 weeks of age until the end of the experiment. 9

### 10 **2.2 miR-467a-5p mimic and the miR-467a-5p antagonist**

11 The miR-467a-5p mimic and the control oligonucleotide were purchased from 12 Dharmacon. The custom LNA-modified miR-467a-5p antagonist and a control 13 oligonucleotide were from Qiagen.

### 14 **2.3 Glucose and insulin tolerance tests (GTT and ITT)**

15 Glucose (2 g/kg body weight) or insulin (50 µg/kg) (Sigma) were injected 16 intraperitoneally. Blood glucose levels were measured 0 – 180 min after injections using 17 an AlphaTRAK glucometer.

### 18 **2.4 Induction of diabetes in mice**

19 Male mice were injected intraperitoneally with streptozotocin (STZ, 50 mg/kg, Sigma) for 20 5 consecutive days. Mice with blood glucose >250 mg/dL were selected for 21 experiments.

### 22 **2.5 Blood cell counts, HDL/LDL cholesterol, and cytokines in blood**

1 Blood was collected by cardiac puncture and circulating blood cell counts were  
2 analyzed using an ADVIA 120 Hematology System (Siemens). Plasma insulin was  
3 measured using Insulin Mouse ELISA kit (Thermo).  
4 A custom U-plex Assay Platform (MSD) was used to assess plasma levels of CCL2  
5 (MCP-1), IL-10, CXCL1, and VEGF-A.  
6 HDL and LDL cholesterol were measured using the HDL and LDL/VLDL quantification  
7 kit (BioVision) at end of the experiment.

## 8 **2.6 Immunohistochemical staining**

9 Visceral (omental) adipose tissue and pancreas were fixed in 4% formaldehyde  
10 (Electron Microscopy Sciences) for 24 hours and stained using VECTASTAIN ABC-  
11 HRP Kit (Vector Labs) with corresponding primary antibodies. Slides were scanned  
12 using Leica SCN400 or Aperio AT2 at 20X magnification. Quantification of positive  
13 staining was performed using Photoshop CS2 (Adobe) or Image Pro Plus (7.0).

## 14 **2.7 Cell culture**

15 RAW264.7, THP-1,  $\beta$ TC6 and 3T3-L1 cells were purchased from ATCC and cultured  
16 according to ATCC directions.

17 **2.8 Isolation of bone marrow-derived macrophages (BMDM)** was performed as  
18 described in <sup>30</sup>.

## 19 **2.9 Glucose stimulation of RAW264.7, differentiated THP-1, $\beta$ TC6, and BMDM**

20 Cells were stimulated with 30 mM D-glucose High Glucose, "HG" (Sigma) for 6 hours  
21 (RAW 264.7 and BMDM), 3 hours (3T3-L1) or 30 minutes ( $\beta$ TC6).

## 1 **2.10 Transfection of cultured cells**

2 Transfections were aided with Oligofectamine (Invitrogen).

## 3 **2.11 Oil Red O Staining**

4 Differentiated 3T3-L1 cells were stained in the Oil Red O solution for 10' at RT.

## 5 **2.12 RNA Extraction and RT-qPCR**

6 RNA was isolated using Trizol reagent (Thermo).

7 RNA was polyadenylated using NCode miRNA First-Strand cDNA Synthesis kit

8 (Invitrogen) or miRNA 1st strand cDNA synthesis kit (Agilent). Real-time qPCR

9 amplification was performed using SYBR GreenER™ qPCR SuperMix Universal

10 (Thermo) or miRNA QPCR Master Mix (Agilent).

11 To measure expression of inflammatory markers, Real-time qPCR was performed using

12 TaqMan primers for *Tnf*, *Il6*, *Ccl2*, *Il1b*, *Il10*, *Ccl4*, *Cd68*, *Slc2a1*, *Slc2a2*, *Slc2a4*, *G6pc*,

13 *Fbp1* (Thermo) and TaqMan Fast Advanced Master Mix (Thermo) as described <sup>31</sup>.

14  $\beta$ -actin primers (CAT GTA CGT TGC TAT CCA GGC, IDT) were used for normalization

15 by the the  $2^{-\Delta\Delta Ct}$  method. All samples were assayed in triplicates using a fluorescence-

16 based, real-time detection method (BioRad MyIQ RT-PCR, Thermo).

## 17 **2.13 Statistical analysis**

18 Data are expressed as the mean value  $\pm$  S.E.M. Statistical analysis was performed

19 using GraphPad Prism 5 Software. Student's t-test and ANOVA were used to determine

20 the significance of parametric data, and Mann-Whitney test was used for nonparametric

21 data.

22

## 1 **3. RESULTS**

### 2 **3.1 Injections of miR-467a-5p antagonist increase macrophage accumulation in** 3 **adipose tissue and pancreas**

4 Inflammation and macrophage infiltration in tissues are associated with, and often  
5 precede, IR<sup>32-37</sup>. Macrophage accumulation in adipose tissue and pancreas was  
6 assessed by immunohistochemistry using an anti-MOMA-2 or anti-CD68 antibody  
7 (Figures 1A – 1D; Figures S1A – S1D show H&E and images of immunohistochemical  
8 staining).

9 Male WT mice on chow diet were injected weekly with a miR-467a-5p antagonist (2.5  
10 mg/kg) for 32 weeks, starting at 5 weeks of age. Injections of the miR-467a-5p  
11 antagonist increased macrophage accumulation in AT of chow-fed mice by 47% (Figure  
12 1A). Baseline AT macrophage infiltration was increased in mice on Western diet  
13 (65.4%, Figure S2A) without further increase in response to antagonist (Figure 1B).

14 In pancreas, macrophage infiltration tended to increase in antagonist-injected mice on  
15 either diet (62.4% increase, chow-fed and 43.9% increase, Western diet (Figures 1C,  
16 1D) and was significantly increased by the Western diet (73.3%, Figure S2B).

17 Changes in tissue macrophage infiltration in response to the antagonist were not  
18 explained by the number of monocytes in blood (Figure S3): blood monocyte numbers  
19 were not increased by the antagonist. The Western diet increased numbers of  
20 circulating monocytes and white blood cells (Figures S3A – C).

### 21 **3.2 miR-467a-5p antagonist has differential effects on the expression of** 22 **inflammatory markers in adipose tissue**



1 Adipose tissue expression of *Il6*, *Tnf*, *Ccl2*, *Ccl4*, or *Il1b* was assessed by RT-qPCR in  
2 chow or Western diet-fed WT mice (Figures 2A, 2B, respectively) injected with miR-  
3 467a-5p antagonist or control oligonucleotide.

4 Out of five cytokines, only *Il6* expression was statistically significantly increased by the  
5 antagonist in chow-fed mice (Figure 2A). Notably, all cytokine expression tended to be  
6 reduced in Western diet-fed mice in response to the antagonist (Figure 2B).

7 Western diet increased baseline expression of inflammatory markers in AT of WT mice  
8 injected with control oligonucleotide (Figure S4).

### 9 **3.3 TSP-1 knockout does not prevent macrophages infiltration in mice injected** 10 **with the miR-467a-5p antagonist**

11 We reported that TSP-1 is a direct target of miR-467<sup>21</sup> and the main mediator of miR-  
12 467 effects on cancer angiogenesis<sup>22</sup>. *Thbs1*<sup>-/-</sup> mice were used, as described above, to  
13 determine whether macrophage infiltration is regulated by miR-467 through TSP-1  
14 silencing. The miR-467a-5p antagonist did not prevent accumulation of AT  
15 macrophages from mice on chow or Western diet (Figures 3A, B). Macrophage  
16 infiltration in pancreas of *Thbs1*<sup>-/-</sup> mice was similar to infiltration of macrophages in  
17 pancreas of WT mice (Figures 3C, D).

18 In *Thbs1*<sup>-/-</sup> mice, baseline AT macrophage infiltration was not affected by Western diet  
19 (Figure S5A), which was different from the effect of the Western diet in WT mice (Figure  
20 S2). Pancreas macrophage infiltration in *Thbs1*<sup>-/-</sup> mice on Western diet significantly  
21 increased ~ 63.7% (Figure S5B, *P*=.03).

1 Similar to WT mice, *Thbs1*<sup>-/-</sup> blood monocyte numbers were not increased by the  
2 antagonist. The Western diet increased numbers of circulating monocytes and white  
3 blood cells (Figures S3D – F).

#### 4 **3.4 miR-467a-5p antagonist has no effect on macrophage infiltration and levels of** 5 **inflammatory markers in liver**

6 Hepatic inflammation and macrophage infiltration in liver are associated with  
7 development of hyperglycemia and IR<sup>38-40</sup>. The levels of miR-467 were upregulated in  
8 liver of mice on Western diet (Figure S6A). We evaluated the expression of  
9 inflammatory and macrophage markers in liver (Figure S6). Expression of *Tnf* and *Il1b*  
10 were unaffected by the antagonist (Figure S6B, C and S6D, E) and macrophage  
11 infiltration was unchanged by the antagonist as shown by the expression of  
12 macrophage marker *Cd68* (Figure S6F, G).

#### 13 **3.5 Systemic injections of miR-467a-5p antagonist increase fasting insulin levels** 14 **and decrease insulin sensitivity in chow-fed WT mice**

15 In chow-fed mice, fasting blood glucose and insulin levels were measured at the end of  
16 the experiment. Inhibiting miR-467, using systemic injections of the antagonist, had no  
17 effect on fasting blood glucose levels in chow-fed mice but significantly increased  
18 fasting insulin levels (0.53 vs 1.01 mg/dL) (Figures 4A, B).

19 In glucose tolerance tests (GTT), no changes were observed (Figure S7A). However,  
20 elevated glucose levels in antagonist-injected mice were observed during the ITT for all  
21 time points (Figure 4C).

1 Analyzing the rate of glucose disappearance from plasma (based on the  $K_{itt}$  analysis at  
2 0 – 60 minutes, when the decrease in glucose levels was linear) revealed a significant  
3 decrease in glucose clearance in response to the antagonist (Figure 4D).

### 4 **3.6 Systemic injections of miR-467a-5p antagonist do not affect mouse weight or** 5 **blood lipid profile in chow-fed mice**

6 Weight, HDL and LDL cholesterol, total cholesterol, and free cholesterol were  
7 measured. Antagonist injections had no effect on LDL (Figure S7D), but decreased  
8 HDL, total and free cholesterol, Figures S7C, E, F).

9 Similar to WT mice, weight was not affected by the antagonist in *Thbs1*<sup>-/-</sup> mice (Figure  
10 S7H). The levels of HDL, total and free cholesterol were unchanged in response to the  
11 antagonist (Figures S7I, K, L), but the LDL cholesterol levels were increased in mice  
12 injected with the antagonist in the absence of TSP-1 (Figure S7J).

### 13 **3.7 TSP-1 knockout eliminates the effects of miR-467a-5p antagonist on insulin** 14 **sensitivity in chow-fed mice**

15 As with WT mice, fasting blood glucose and insulin levels were measured in *Thbs1*<sup>-/-</sup>  
16 mice at the end of the experiment. *Thbs1*<sup>-/-</sup> mice were used in an identical experimental  
17 design as described above (Figure 4). Without TSP-1, there was no effect by the  
18 antagonist on blood insulin levels (Figure 4F). No differences were observed in GTT  
19 (Figure S7G). In *Thbs1*<sup>-/-</sup> mice, unlike in WT mice, blood glucose was not increased in  
20 the ITT in response to the antagonist at any time point (Figure 4G). Surprisingly,  
21 antagonist injections tended to improve IS, suggesting that other targets of miR-467  
22 may become important in the absence of TSP-1. Loss of TSP-1 normalized, and even

1 slightly increased, the plasma glucose disappearance rate in antagonist-injected mice  
2 (Figure 4H).

### 3 **3.8 Systemic injections of miR-467a-5p antagonist increase blood glucose levels** 4 **and decrease fasting insulin levels in WT mice on the Western diet**

5 In Western-diet-fed mice, similar experiments revealed a different response to miR-467  
6 inhibition and a loss of its protective function. As expected, mice on a Western diet  
7 developed diet-induced IR: fasting blood glucose levels were increased compared to  
8 chow-fed mice ( $102.7 \pm 2.88$  vs  $117.9 \pm 2.42$ ,  $P < .001$  Figure 5A vs 4A); insulin levels  
9 were twice higher in mice on Western diet ( $0.5301 \pm .0820$  vs  $.9327 \pm .0660$ ,  $P = .0015$   
10 Figure 5B vs 4B). Antagonist injections further increased blood glucose levels by  
11 20.85% ( $142.4$  vs  $117.9$  mg/dL) in mice on the Western diet (Figure 5A) but significantly  
12 decreased blood insulin levels by 25.81% ( $0.69$  vs  $0.93$  ng/mL, Figure 5B). Glucose  
13 clearance was delayed in the GTT (Figure 5C). The antagonist did not increase glucose  
14 levels in ITT, but a higher baseline blood glucose levels was detected compared to mice  
15 on chow in Figure 4A (Figure 5D). Analysis of the rate of glucose disappearance from  
16 plasma ( $K_{itt}$  analysis) revealed a significant increase in glucose clearance in antagonist-  
17 injected mice, which was opposite in chow-fed mice (Figure 5E vs 4D). These data  
18 suggest that, in mice on Western diet, the protective effect of miR-467 (decreased  
19 insulin levels and accelerated clearance of glucose from blood) is lost and even further  
20 counteracted by new, pro-IR effects of miR-467.

### 21 **3.9 Systemic injections of miR-467a-5p antagonist do not affect mouse weight or** 22 **blood lipid profile in WT mice on Western Diet**

1 Similar to mice on the chow diet, the antagonist did not affect the weight or the  
2 lipoprotein cholesterol levels in WT mice on Western diet (Figures S8A – E). As was  
3 expected, the baseline weight and levels of HDL and LDL cholesterol, total and free  
4 cholesterol were increased by the diet itself (Figures S7C – F vs S8B – E).

### 5 **3.10 The antagonist effect on insulin and glucose levels is lost in *Thbs1*<sup>-/-</sup> mice on** 6 **Western**

7 Similar to the effects in chow-fed mice, loss of TSP-1 in *Thbs1*<sup>-/-</sup> mice on Western diet  
8 abolished the antagonist effects on glucose and insulin levels and blood glucose  
9 clearance (Figures 5F – J). This indicates these functions of miR-467, and the effects of  
10 the antagonist depend on TSP-1 regulation. Loss of TSP-1 prevented increases in  
11 fasting blood glucose levels and decreases in fasting blood insulin levels (Figures 5F,  
12 5G) that were observed in WT mice on Western diet (Figures 5A, 5B). Additionally, loss  
13 of TSP-1 eliminated antagonist effects on blood glucose levels in GTT and ITT and  
14 plasma glucose clearance rate (Figures 5H – J).

### 15 **3.11 Systemic injections of miR-467a-5p antagonist do not affect mouse weight or** 16 **blood lipid profile in *Thbs1*<sup>-/-</sup> mice on Western Diet**

17 Similar to WT mice, *Thbs1*<sup>-/-</sup> mouse weight, HDL and LDL cholesterol, and free and total  
18 cholesterol levels were not affected by the miR-467a-5p antagonist (Figures S8F – 8J).  
19 Weight and cholesterol levels were increased by the Western diet in both WT and  
20 *Thbs1*<sup>-/-</sup> mice (Figures S7 vs S8).

### 21 **3.12. Effects of the miR-467 antagonist on the expression of glucose transporters** 22 **(GLUT1, GLU2, GLUT4).**

1 Expression of *Slc2a1*, a ubiquitous insulin-independent glucose transporter GLUT1, was  
2 measured in mouse AT, pancreas, and liver in mice on chow and Western diet injected  
3 with the antagonist or control oligonucleotide (Figures 6A – D).

4 No change in pancreas *Slc2a1* expression was detected in response to the miR-467  
5 antagonist (Figure 6A).

6 *Slc2a1* expression in AT from Western-fed mice was decreased by the antagonist  
7 (Figure 6B), but the effect was lost in *Thbs1*<sup>-/-</sup> mice (Figure 6C), suggesting TSP-1 as a  
8 target in regulation of GLUT1.

9 In liver, *Slc2a1* expression was unaffected by the antagonist, but was decreased by the  
10 Western diet (Figure 6D).

11 In both pancreas and AT, there seemed to be a cumulative effect of the antagonist and  
12 Western diet: the expression was significantly decreased in antagonist-injected mice on  
13 Western diet compared to antagonist-injected mice on chow, without decreased  
14 expression in control oligonucleotide-injected mice (Figures 6A, B).

15 Expression of the major glucose transporters was also measured: *Slc2a2* (GLUT2) in  
16 pancreas and liver and *Slc2a4* (GLUT4) in AT (Figure S9). No changes were detected  
17 in these transporters in response to the antagonist. Western diet affected the  
18 expression in an organ- and transporter-specific manner: in pancreas, *Slc2a1*  
19 expression was lower in mice on Western diet (Figure 6A), while *Slc2a2* expression was  
20 increased (Figure S9A). In AT, *Slc2a1* was decreased Western diet-fed mice (Figure  
21 6B), which was even more pronounced in *Thbs1*<sup>-/-</sup> mice (Figure 6C). AT *Slc2a4*

1 expression was unchanged in either genotype, although in *Thbs1*<sup>-/-</sup> mice, expression  
2 tended to be lower in mice on the Western diet (Figures S9C, D).

### 3 **3.13 miR-467a-5p in adipose tissue and the effects of the antagonist injections**

4 To determine additional changes induced in AT by the antagonist, we evaluated the  
5 levels of miR-467 expression and TSP-1 protein, size of the adipocytes, and quantified  
6 ECM proteins (Figure S10). Differentiated 3T3-L1 (adipocyte-like cells) responded to  
7 high glucose (HG, 30 mM D-glucose) stimulation by increasing levels of miR-467a-5p  
8 by 21.8%±13.81 (Figure S10A, B; *P* = 0.02). However, *in vivo data*, AT miR-467  
9 expression was unchanged in mice on Western diet (Figure S10C) at the end of the  
10 experiment, possibly reflecting the transient upregulation of miR-467 in response to  
11 hyperglycemia.

12 To assess how TSP-1 protein levels were changed in AT, sections were stained with an  
13 anti-TSP-1 antibody (Figure S10D). Area stained with anti-TSP-1 was decreased in  
14 Western diet-fed mice by 71.40% in control group and 49.5% in antagonist-injected  
15 mice (Figure S10D), apparently reflecting the increase in adipocyte size (Figure S10E,  
16 F) and reduction in overall fraction of area between AT cells. As expected, the  
17 antagonist tended to rescue TSP-1 levels in WT mice by 27.30% on chow and 48.97%  
18 on Western diet.

19 Hypertrophic adipocytes contribute to the release of inflammatory cytokines, immune  
20 cell recruitment, and impaired insulin sensitivity. AT sections were H&E stained to  
21 quantify cell sizes (Figures S10E, F). 4864 to 6749 adipocytes per animal were  
22 analyzed. Mean areas and perimeters of adipocytes were increased by the Western diet

1 and tended to increase in response to miR-467a-5p antagonist injections (Figures  
2 S10E, F).

3 Fibrosis and ECM deposits between cells in AT affect remodeling, growth, and function  
4 of adipocytes<sup>32,39,41</sup>. To evaluate changes of ECM amounts in AT, sections were stained  
5 with Masson's Trichrome to assess ECM levels. There was no difference in staining  
6 between the mouse groups (Figure S10G, H).

### 7 **3.14 miR-467a-5p in pancreas and the effects of the antagonist injections**

8 To evaluate other effects of the antagonist in the pancreas, we examined miR-467 and  
9 TSP-1 levels, islet area, and vascularization (Figure S11).

10 Mouse pancreatic islets  $\beta$ -cells ( $\beta$ TC-6) were stimulated with high glucose (HG) and  
11 miR-467a-5p levels were measured. Glucose-stimulated cells significantly increased  
12 miR-467a-5p expression by  $27.7 \pm 4.93\%$  (Figure S11A,  $P = .03$ ). The antagonist  
13 significantly decreased  $\beta$ TC6 expression of miR-467 by 81% (Figure S11B,  $P = .002$ ).  
14 In the *in vivo* experiment, the mean value of pancreatic miR-467a-5p was increased  
15 two-fold on the Western diet ( $208.1\% \pm 173.9$  vs.  $108.6\% \pm 39.04$  in chow diet), but was  
16 not statistically significant (Figure S11C).

17 Sections of pancreas were stained with the anti-insulin antibody and counterstained with  
18 hematoxylin (Figure S11D). The total islet area in the pancreas was unchanged in any  
19 of the mouse groups.

20 We have previously reported that miR-467a-5p promotes angiogenesis as a result of  
21 regulation of production of its target, thrombospondin-1 (TSP1)<sup>21,22</sup>. Thus, we assessed  
22 the potential effect of miR-467a-5p antagonist on vascularization and TSP-1 in the



1 pancreas by immunohistochemistry with anti-vWF, anti- $\alpha$ -actin, and anti-TSP-1  
2 antibodies. There was no change in the vascular cell markers, vWF (marker of  
3 endothelial cells) or  $\alpha$ -actin (marker of vascular smooth muscle cells) in miR-467a-5p  
4 antagonist-injected mice or in response to the Western diet (Figures S11E, F).  
5 We also evaluated TSP-1, a target of miR-467, in the pancreas. At the end of the  
6 experiment, TSP-1 levels were not affected by miR-467 antagonist injections or by the  
7 diet (Figure S11G).

### 8 **3.15. Expression of gluconeogenesis gene expression in liver of mice injected** 9 **with miR-467 antagonist.**

10 To evaluate whether changes in blood glucose were mediated due to regulation of  
11 gluconeogenesis, we examined expression of key gluconeogenesis enzymes in liver  
12 (Figure S12). *G6pc* encodes glucose-6-phosphatase, a regulator of conversion of  
13 glucose 6-phosphate to glucose. Liver *G6pc* expression was decreased by the  
14 antagonist (significant in mice on the Western diet) (Figure S12A). Thus, *G6pc* could not  
15 be responsible for the higher levels and slower clearance of blood glucose from Figure  
16 4. *G6pc* expression was significantly decreased by the Western diet. *Fbp1* is an enzyme  
17 catalyzing the hydrolysis of fructose 1,6-bisphosphate to fructose 6-phosphate and  
18 acting as a rate-limiting enzyme in gluconeogenesis. Liver *Fbp1* was unaffected by  
19 antagonist injections but, like *G6pc*, was decreased by the Western diet (Figure S12B).

### 20 **3.16 High glucose upregulates miR-467a-5p in macrophages**

21 Murine macrophages (RAW 264.7) and differentiated human monocyte (THP-1) cell  
22 lines were stimulated with high glucose (HG, 30mM D-glucose and 30mM L-glucose),  
23 and miR-467a-5p expression was measured. miR-467a-5p was upregulated by 20.6%  $\pm$

1 14.31 in RAW 264.7 and by 540.3%  $\pm$  559.5 in THP-1 in response to HG concentrations  
2 (Figures 7A,C, respectively). Increased miR-467a-5p levels were associated with a  
3 decrease in TSP-1 production by the cells (Figures 7B, 7D,  $P < .05$ ). Consistent with the  
4 mechanisms of miR-467a-5p upregulation by HG previously described by us <sup>21,31</sup>, both  
5 D-glucose and the biologically inactive L-glucose had similar effects: HG upregulated  
6 miR-467a-5p expression and decreased secreted TSP-1, which indicated the osmolarity  
7 change as a stimulus for miR-467a-5p upregulation in macrophages.

8 In cultured mouse bone marrow-derived macrophages (BMDM), miR-467a-5p was  
9 significantly upregulated in response to glucose by 38.7%  $\pm$  28.01 (Figure 7E,  $P = .05$ ).  
10 miR-467a-5p levels were increased in bone marrow (BM) by 74.13% in Western diet-fed  
11 mice (174.3%  $\pm$  42.72 vs. 100.1%  $\pm$  21.95 in chow,  $P < 0.001$ ) compared to chow-fed  
12 mice (Figure 7F). miR-467a-5p levels were increased 4-fold in the non-monocytic fraction  
13 in bone marrow from STZ-treated hyperglycemic BALB/c mice and tended to be  
14 increased in the monocytic fraction (non-monocytes: 411.1%  $\pm$  176.9 in STZ vs. 99.86  $\pm$   
15 32.01 in citrate buffer, Figure 7G,  $P = 0.001$ ).

### 16 **3.17 miR-467a-5p mimic and antagonist regulate production of inflammatory** 17 **signals by the cultured macrophages**

18 Cultured BMDMs from WT mice were transfected with a miR-467a-5p mimic or 467-  
19 antagonist as described in Methods and expression of *Tnf*, *Il6*, *Ccl2*, and *Ccl4* were  
20 measured. Expression of all four cytokines was increased by HG (Figures S13A, B), but  
21 miR-467a-5p mimic had no additional effect (Figure S13A).

22 Inhibiting miR-467a-5p with the antagonist in BMDMs from WT mice prevented the  
23 upregulation of *Tnf* and *Ccl4* in response to HG (Figure S13B), suggesting that these

1 two cytokines are regulated by HG through the miR-467-dependent mechanism, while  
2 others are not.

3 When cultured BMDMs isolated from *Thbs1*<sup>-/-</sup> mice were transfected with the miR-467a-  
4 5p mimic or antagonist, upregulation by high glucose was similar to BMDMs from WT  
5 mice (Figures S13C, D), except for *Ccl4* which was not upregulated by HG in the  
6 absence of TSP-1. The increase in *Tnf* by HG was still blunted by the antagonist,  
7 suggesting this effect is not dependent on TSP-1 and that miR-467 uses multiple targets  
8 in regulating inflammation. We did not observe a difference in basal levels of cytokines  
9 between WT and *Thbs1*<sup>-/-</sup> cells (not shown).

### 10 **3.18 Differential effects of the miR-467a-5p antagonist on plasma levels of** 11 **inflammatory cytokines**

12 Plasma levels of MCP-1, IL-10, CXCL1, and VEGF-A were measured in WT and *Thbs1*<sup>-/-</sup>  
13 mice on chow or Western diet (Figures S13E – H). MCP-1, IL-10, and CXCL1 levels  
14 were significantly increased by the Western diet in both mouse genotypes (Figures 13E  
15 – G). The effects of the Western diet on the levels of cytokines were specific: VEGF-A  
16 was not increased (Figure S13H).

17 In WT mice, MCP-1 levels were increased by the miR-467a-5p antagonist on the  
18 Western diet (Figure S13E, *P* = 0.05) but not in *Thbs1*<sup>-/-</sup> mice. The antagonist tended to  
19 decrease the levels of IL-10 in WT mice on the Western diet (Figure S13F, *P* = 0.06),  
20 but this effect was lost in the *Thbs1*<sup>-/-</sup> mice. Thus, these two markers were regulated by  
21 miR-467 and TSP-1.

- 1 There was no effect of the antagonist or TSP-1 deletion on CXCL1 or VEGF-A levels
- 2 (Figures S13G, H), suggesting that these two markers are not regulated by miR-467 or
- 3 TSP-1.
- 4

## 1 **4. DISCUSSION**

2 The sequence and causality of events in development of IR are still poorly understood  
3 <sup>42</sup>, and physiological mechanisms normally preventing development of IR are unclear.  
4 Dietary factors increasing blood glucose and insulin production may induce IR <sup>43-46</sup>, and  
5 inflammation and infiltration of metabolically active tissues with macrophages are  
6 recognized as important and causative factors in IR development <sup>32-37</sup>. Here we report  
7 miR-467 decreases blood insulin level and accelerates glucose clearance: the injections  
8 of miR-467 antagonist increased fasting insulin levels and reduced insulin sensitivity  
9 and glucose clearance from the blood. Inhibition of miR-467 in chow-fed mice raised  
10 insulin levels up to those of mice on the Western diet, and Western diet, rich in fats and  
11 sugars, results in a loss of this physiological function of miR-467, either due to the  
12 presence of other unidentified mRNA targets induced by the Western diet or due to  
13 other cellular mechanisms activated by the Western diet, which are counteracting miR-  
14 467 effects.

15 Metabolic disorders are often thought to be a direct consequence of the weight gain and  
16 changes in the lipoprotein profile <sup>47</sup>. When we inhibited miR-467a-5p, the changes in the  
17 blood glucose and insulin levels were uncoupled from the weight gain and impairment of  
18 lipoprotein metabolism, suggesting that the effect of miR-467a-5p is not mediated by  
19 change in weight or cholesterol.

20 One of the potential reasons identified may be the decreased expression of an insulin-  
21 independent glucose transporter GLUT1, a main glucose transporter regulating insulin  
22 production in human pancreas. The decreased expression of *Slc2a1* in response to the  
23 antagonist injections in mice on Western diet coincided with lower blood insulin levels,

1 higher glucose levels, and increased glucose clearance from plasma. Regulatory  
2 regions of *Slc2a1* (GLUT1) mRNA do not have predicted target sites for miR-467, thus,  
3 the regulation by miR-467 is most likely indirect. The effect on *Slc2a1* expression in the  
4 absence of an effect on other glucose transporters suggests that the regulation may not  
5 be associated with change in insulin sensitivity and that regulation of blood insulin levels  
6 by miR-467 may be secondary.

7 Inflammation and the expression of glucose transporters and key enzymes of  
8 gluconeogenesis were examined in livers, but no changes were detected in response to  
9 the antagonist injections, confirming that the effect of the antagonist is associated with  
10 the regulation of glucose clearance rather than glucose production.

11 We previously reported that TSP-1 transcript is a target of miR-467 and mediates miR-  
12 467 effect on angiogenesis. Interestingly, all effects of the antagonist on the blood  
13 glucose and insulin levels were lost in *Thbs1*<sup>-/-</sup> mice, suggesting that TSP-1 is the main  
14 target of miR-467, and the differential regulation in chow-fed and Western-diet-fed mice  
15 is downstream of TSP-1. TSP-1 is a known regulator of insulin sensitivity and metabolic  
16 disorder<sup>18-20,48,49</sup>.

17 In adipose tissue, pro-inflammatory molecules are released by adipocytes and activated  
18 macrophages to promote insulin resistance<sup>50-53</sup>. The inhibition of miR-467a-5p  
19 increased infiltration of macrophages in the adipose tissue and in the pancreas,  
20 suggesting that miR-467a-5p prevents inflammation. Additionally, our results and  
21 reports from others stress the importance of ECM, and TSP-1 (a target of miR-467a-5p)  
22 specifically, and other TSPs, in the recruitment of inflammatory cells into tissues<sup>18-20,54-</sup>  
23 <sup>58</sup>. The increase in macrophage infiltration in adipose tissue was associated with the

1 increased *Il6* levels, which was lost in *Thbs1*<sup>-/-</sup> mice. However, the levels of *Tnf*, *Ccl2*,  
2 *Ccl4*, and *Il1b* were not changed by the antagonist injections.

3 The reduction of inflammation in the obese AT in response to the miR-467 antagonist  
4 may be due to a significant decrease in GLUT1 (*Slc2a1*) expression. Bone-marrow-  
5 derived macrophages isolated from mice with a myeloid-specific knockout of GLUT1  
6 (*Slc2a1*) were “metabolically reprogrammed” such that they were unable to uptake  
7 glucose properly and had a decreased inflammatory phenotype<sup>59</sup>. In tissues from  
8 Western diet-fed mice, there may be additional miR-467 targets not expressed in chow-  
9 fed mice; these may modify the antagonist effects, thus abolishing the inflammation and  
10 IR protection by miR-467.

11 The role of miR-467 is not limited to regulation of local inflammation in tissues: the effect  
12 of miR-467 inhibition on systemic inflammation was observed by changes in plasma  
13 levels of MCP-1 and IL-10. Both were increased in mice on Western diet, and MCP-1  
14 was further increased upon inhibition of miR-467. In *Thbs1*<sup>-/-</sup> mice, the antagonist had  
15 no effect, suggesting that both cytokines in plasma are regulated by miR-467 through a  
16 TSP-1-dependent pathway.

17 miR-467a-5p was upregulated by high glucose in primary bone-marrow-derived  
18 macrophages (BMDMs), macrophage-like cell lines, and inflammatory blood cells from  
19 the bone marrow, suggesting that macrophages aid in regulating miR-467a-5p-  
20 dependent pathways, and macrophages infiltration may enhance the significance of the  
21 pathway in metabolically active tissues. Increased miR-467a-5p levels coincided with  
22 the inhibition of TSP-1 production by macrophages, as we observed previously in other  
23 cell types<sup>21,22,31</sup>.

1 miR-467a-5p regulated the pro-inflammatory functions of cultured BMDMs: cytokine  
2 expression of *Tnf*, *Il6*, *Ccl2*, and *Ccl4* was upregulated by high glucose (HG). Only *Ccl4*  
3 and *Tnf*, were upregulated in cultured macrophages by HG through the miR-467-  
4 dependent mechanism; their upregulation was prevented by the miR-467 antagonist.  
5 Only *Ccl4* appears to be regulated through TSP-1 pathway: upregulation, and the effect  
6 of miR-467 antagonist, were lost in BMDMs from *Thbs1*<sup>-/-</sup> mice. These results  
7 suggested that inflammation is regulated by miR-467a-5p through multiple targets and  
8 in a cell-specific manner in various cell types.

9 Our results unveil the physiological role of miR-467a-5p: when this miRNA is  
10 upregulated by high blood glucose<sup>21,22,31</sup>, it protects against the development of IR and  
11 inflammation in response to high glucose. Interestingly, this protection is lost under a  
12 long-term Western diet, underscoring the negative effects of this chronic stressor.



## 1 **AUTHOR CONTRIBUTIONS**

2 JG performed experiments, analyzed experimental data, developed experimental plan,  
3 and wrote the manuscript. IK performed experiments, analyzed experimental data,  
4 participated in discussion of the results and preparation of the manuscript. RY  
5 performed immunohistochemistry experiments, analyzed experimental data, and  
6 participated in discussion of the results and the plan for the manuscript. DV performed  
7 animal experiments, contributed to the discussion of the results and preparation of the  
8 manuscript. AV analyzed the adipocyte size, developed the program and the plan of for  
9 these analyses, and participated in the discussion of the result and the manuscript. LS  
10 performed experiments in cultured cells, analyzed experimental data, and participated in  
11 discussions of the results and of the manuscript. OS-A sponsored the project,  
12 developed the experimental design, participated in generation of immunohistochemistry  
13 data, analyzed experimental data, and prepared the manuscript.

14 The first author, JG and the corresponding author, OS-A, take full responsibility for the  
15 work as a whole, including (if applicable) the study design, access to data, and the  
16 decision to submit and publish the manuscript.

## 17 **ACKNOWLEDGEMENTS**

18 This work was supported by R01CA177771 and R01HL117216, to OS-A and  
19 17PRE33660475 from the American Heart Association (PI: JG, Sponsor: OS-A).

## 20 **CONFLICTS OF INTEREST**

21 The authors report no conflict of interest.

## 22 **DATA AVAILABILITY STATEMENT**

1 The data that supports the findings of this study are available from the corresponding  
2 author upon reasonable request.

### 3 **Figure Legends**

#### 5 **Figure 1. miR-467 antagonist increases macrophage accumulation in adipose 6 tissue and pancreas from WT chow-fed mice.**

7 Macrophage accumulation in adipose tissue from WT mice on chow diet (A) and  
8 Western diet (B) was determined by anti-MOMA-2 staining. Positive staining was  
9 normalized to mean adipocyte area for adipose tissue since adipocyte sizes were  
10 changed between groups. Macrophage accumulation in pancreas from WT mice on  
11 chow diet (C) and Western diet (D) was determined by anti-CD68 staining. Data are  
12 relative to ctrl oligo. n=10 mice/group. \* $P < .05$

13

#### 14 **Figure 2. Inflammation in adipose tissue from WT mice on chow and Western diet.**

15 Effect of miR-467 antagonist on expression of pro-inflammatory markers (*Il6*, *Tnf*, *Ccl2*,  
16 *Ccl4*, *Il1b*) were assessed in WT chow (A) and Western diet (B) whole adipose tissue by  
17 RT-qPCR, normalized to  $\beta$ -actin. Data are relative to ctrl oligo. n=10 mice/group.  
18 \* $P < .05$

19

#### 20 **Figure 3. Macrophage accumulation in adipose tissue and pancreas from *Thbs1*<sup>-/-</sup> 21 mice on chow or Western diet.**

22 Macrophage accumulation in adipose tissue from *Thbs1*<sup>-/-</sup> mice on chow diet (A) and  
23 Western diet (B) was determined by anti-MOMA-2 staining. Positive staining was  
24 normalized to mean adipocyte area for adipose tissue since adipocyte sizes were

1 changed between groups. Macrophage accumulation in pancreas from *Thbs1*<sup>-/-</sup> mice on  
2 chow diet (C) and Western diet (D) was determined by anti-CD68 staining. Data are  
3 relative to ctrl oligo. n=7 mice/group. \**P*<.05

4

5 **Figure 4. Inhibition of miR-467 increased fasting insulin and increased insulin**  
6 **resistance WT chow-fed mice, but not *Thbs1*<sup>-/-</sup> mice.**

7 Male WT (A – D) or *Thbs1*<sup>-/-</sup> (E – H) mice began a chow diet at 4 weeks of age for 32  
8 weeks. Starting at 5 weeks of age, mice received weekly injections of a control oligo or  
9 a 467-antagonist. Data are from end point. (A, E) Fasting blood glucose levels were  
10 measured with a glucometer. (B, F) Fasting insulin levels were measured by ELISA. (C,  
11 G) Time course for the intraperitoneal insulin tolerance test (ITT) were performed. (D, H)  
12 Rate constant for plasma glucose disappearance,  $K_{itt}$ , from 0 – 60 minutes. \**P*<.05

13

14 **Figure 5. Inhibition of miR-467 in WT mice on a Western diet increased sensitivity**  
15 **to insulin, glucose clearance, and fasting blood glucose despite decreased**  
16 **fasting insulin.**

17 Male WT (A – E) or *Thbs1*<sup>-/-</sup> (F – J) mice began a Western diet at 4 weeks of age for 32  
18 weeks in an identical experiment as the chow-fed mice. Data are from end point. (A, F)  
19 Fasting blood glucose levels were measured with a glucometer. (B, G) Fasting insulin  
20 levels were measured by ELISA. Time course for the intraperitoneal glucose tolerance  
21 test (GTT) (C, H) and insulin tolerance test (ITT) (D, I) were performed. (E, J) Rate  
22 constant for plasma glucose disappearance,  $K_{itt}$ , from 0 – 60 minutes. \**P*<.05

23

1 **Figure 6. Effects of the miR-467 antagonist on the expression of glucose**  
2 **transporter *Slc2a1* (GLUT1).**

3 Expression of *Slc2a1*, a ubiquitous insulin-independent glucose transporter, GLUT1,  
4 was measured in WT pancreas (A), adipose tissue from WT (B) and *Thbs1<sup>-/-</sup>* (C), and  
5 liver (D) in mice on chow or Western diet injected with the antagonist or control  
6 oligonucleotide. Data are relative to Chow ctrl. \* $P < .05$  vs ctrl oligo, #  $P < .05$  vs chow diet

7  
8 **Figure 7. High glucose upregulates miR-467 in macrophages.**

9 (A, C) Expression of miR-467 after 3 hours of glucose stimulation in cultured mouse  
10 macrophages (RAW 264.7) and differentiated human monocyte (THP-1) cell lines was  
11 measured by RT-qPCR and normalized to  $\beta$ -actin, n=3-8 independent replicates. (B, D)  
12 TSP-1 secretion was assessed in cell supernatants after 24 hrs of glucose stimulation  
13 by Western Blot. Quantification of densitometry is shown and relative to the control, n=3  
14 independent replicates. \* $P < .05$  vs ctrl. (E) miR-467 expression in cultured WT bone  
15 marrow-derived macrophages (BMDM) 6 hours post glucose stimulation. Data are  
16 relative to low glucose (LG) ctrl samples, n=3 independent replicates. \* $P < .05$  (F) miR-  
17 467 expression in whole bone marrow (BM) from WT mice on chow or Western diet for  
18 32 weeks, n=10 mice/group. Data are relative to chow mice \* $P < .05$  (G) miR-467  
19 expression in BM monocytes or non-monocytes from male BALB/c mice injected with  
20 STZ to induce diabetes, or a citrate buffer control. Data are relative to citrate buffer ctrl.  
21 n=10 mice/group. \* $P < .05$  vs citrate buffer ctrl

22

23

1  
2  
3  
4  
5  
6  
7  
8  
9  
10  
11  
12  
13  
14  
15  
16  
17  
18  
19  
20  
21  
22

### References

1. Guay C, Roggli E, Nesca V, Jacovetti C, Regazzi R. Diabetes mellitus, a microRNA-related disease? *Transl Res.* 2011;157(4):253-264.
2. Deiuliis JA. MicroRNAs as regulators of metabolic disease: pathophysiologic significance and emerging role as biomarkers and therapeutics. *Int J Obes (Lond).* 2016;40(1):88-101.
3. Iacomino G, Siani A. Role of microRNAs in obesity and obesity-related diseases. *Genes Nutr.* 2017;12:23.
4. Miranda K, Yang X, Bam M, Murphy EA, Nagarkatti PS, Nagarkatti M. MicroRNA-30 modulates metabolic inflammation by regulating Notch signaling in adipose tissue macrophages. *Int J Obes (Lond).* 2018;42(6):1140-1150.
5. LaPierre MP, Stoffel M. MicroRNAs as stress regulators in pancreatic beta cells and diabetes. *Mol Metab.* 2017;6(9):1010-1023.
6. Lackey DE, Olefsky JM. Regulation of metabolism by the innate immune system. *Nat Rev Endocrinol.* 2016;12(1):15-28.
7. Singh M, Benencia F. Inflammatory processes in obesity: focus on endothelial dysfunction and the role of adipokines as inflammatory mediators. *Int Rev Immunol.* 2019;38(4):157-171.
8. Chawla A, Nguyen KD, Goh YP. Macrophage-mediated inflammation in metabolic disease. *Nat Rev Immunol.* 2011;11(11):738-749.

- 1 9. Hotamisligil GS. Inflammation and metabolic disorders. *Nature*.  
2 2006;444(7121):860-867.
- 3 10. Donath MY, Shoelson SE. Type 2 diabetes as an inflammatory disease. *Nat Rev*  
4 *Immunol*. 2011;11(2):98-107.
- 5 11. Pavlou S, Lindsay J, Ingram R, Xu H, Chen M. Sustained high glucose exposure  
6 sensitizes macrophage responses to cytokine stimuli but reduces their phagocytic  
7 activity. *BMC Immunol*. 2018;19(1):24.
- 8 12. Yuan Y, Chen Y, Peng T, et al. Mitochondrial ROS-induced lysosomal dysfunction  
9 impairs autophagic flux and contributes to M1 macrophage polarization in a  
10 diabetic condition. *Clin Sci (Lond)*. 2019;133(15):1759-1777.
- 11 13. Oh H, Park SH, Kang MK, et al. Asaronic Acid Attenuates Macrophage Activation  
12 toward M1 Phenotype through Inhibition of NF-kappaB Pathway and JAK-STAT  
13 Signaling in Glucose-Loaded Murine Macrophages. *J Agric Food Chem*.  
14 2019;67(36):10069-10078.
- 15 14. Zhang X, Yang Y, Zhao Y. Macrophage phenotype and its relationship with renal  
16 function in human diabetic nephropathy. *PLoS One*. 2019;14(9):e0221991.
- 17 15. Koppaka S, Kehlenbrink S, Carey M, et al. Reduced adipose tissue macrophage  
18 content is associated with improved insulin sensitivity in thiazolidinedione-treated  
19 diabetic humans. *Diabetes*. 2013;62(6):1843-1854.
- 20 16. Carnevali JB, Qiu Y, Chawla A. Blood spotlight on leukocytes and obesity. *Blood*.  
21 2013;122(19):3263-3267.

- 1 17. Weisberg SP, McCann D, Desai M, Rosenbaum M, Leibel RL, Ferrante AW, Jr.  
2 Obesity is associated with macrophage accumulation in adipose tissue. *J Clin*  
3 *Invest.* 2003;112(12):1796-1808.
- 4 18. Memetimin H, Li D, Tan K, et al. Myeloid Specific Deletion of Thrombospondin 1  
5 Protects Against Inflammation and Insulin Resistance in Long-term Diet-induced  
6 Obese Male Mice. *Am J Physiol Endocrinol Metab.* 2018.
- 7 19. Maimaitiyiming H, Clemons K, Zhou Q, Norman H, Wang S. Thrombospondin1  
8 deficiency attenuates obesity-associated microvascular complications in ApoE-/-  
9 mice. *PLoS One.* 2015;10(3):e0121403.
- 10 20. Li Y, Tong X, Rumala C, Clemons K, Wang S. Thrombospondin1 deficiency  
11 reduces obesity-associated inflammation and improves insulin sensitivity in a diet-  
12 induced obese mouse model. *PLoS One.* 2011;6(10):e26656.
- 13 21. Bhattacharyya S, Sul K, Krukovets I, Nestor C, Li J, Adognravi OS. Novel tissue-  
14 specific mechanism of regulation of angiogenesis and cancer growth in response  
15 to hyperglycemia. *J Am Heart Assoc.* 2012;1(6):e005967.
- 16 22. Krukovets I, Legerski M, Sul P, Stenina-Adognravi O. Inhibition of hyperglycemia-  
17 induced angiogenesis and breast cancer tumor growth by systemic injection of  
18 microRNA-467 antagonist. *FASEB J.* 2015;29(9):3726-3736.
- 19 23. Raman P, Harry C, Weber M, Krukovets I, Stenina OI. A novel transcriptional  
20 mechanism of cell type-specific regulation of vascular gene expression by glucose.  
21 *Arterioscler Thromb Vasc Biol.* 2011;31(3):634-642.

- 1 24. Gajeton J, Krukovets I, Muppala S, Verbovetskiy D, Zhang J, Stenina-Adognravi  
2 O. Hyperglycemia-induced miR-467 drives tumor inflammation and growth in  
3 breast cancer. *bioRxiv*. 2020:2020.2007.2001.182766.
- 4 25. Guan XM, Li YX, Xin H, et al. Effect of miR-467b on atherosclerosis of rats. *Asian*  
5 *Pac J Trop Med*. 2016;9(3):298-301.
- 6 26. Tian GP, Chen WJ, He PP, et al. MicroRNA-467b targets LPL gene in RAW 264.7  
7 macrophages and attenuates lipid accumulation and proinflammatory cytokine  
8 secretion. *Biochimie*. 2012;94(12):2749-2755.
- 9 27. Ahn J, Lee H, Chung CH, Ha T. High fat diet induced downregulation of microRNA-  
10 467b increased lipoprotein lipase in hepatic steatosis. *Biochem Biophys Res*  
11 *Commun*. 2011;414(4):664-669.
- 12 28. Tian GP, Tang YY, He PP, et al. The effects of miR-467b on lipoprotein lipase  
13 (LPL) expression, pro-inflammatory cytokine, lipid levels and atherosclerotic  
14 lesions in apolipoprotein E knockout mice. *Biochem Biophys Res Commun*.  
15 2014;443(2):428-434.
- 16 29. Hullinger TG, Montgomery RL, Seto AG, et al. Inhibition of miR-15 protects against  
17 cardiac ischemic injury. *Circ Res*. 2012;110(1):71-81.
- 18 30. Amend SR, Valkenburg KC, Pienta KJ. Murine Hind Limb Long Bone Dissection  
19 and Bone Marrow Isolation. *J Vis Exp*. 2016(110).
- 20 31. Bhattacharyya S, Marinic TE, Krukovets I, Hoppe G, Stenina OI. Cell type-specific  
21 post-transcriptional regulation of production of the potent antiangiogenic and  
22 proatherogenic protein thrombospondin-1 by high glucose. *J Biol Chem*.  
23 2008;283(9):5699-5707.



- 1 32. Sun K, Kusminski CM, Scherer PE. Adipose tissue remodeling and obesity. *J Clin*  
2 *Invest.* 2011;121(6):2094-2101.
- 3 33. Xu H, Barnes GT, Yang Q, et al. Chronic inflammation in fat plays a crucial role in  
4 the development of obesity-related insulin resistance. *J Clin Invest.*  
5 2003;112(12):1821-1830.
- 6 34. Florez JC. Newly identified loci highlight beta cell dysfunction as a key cause of  
7 type 2 diabetes: where are the insulin resistance genes? *Diabetologia.*  
8 2008;51(7):1100-1110.
- 9 35. McCarthy MI. Genomics, type 2 diabetes, and obesity. *N Engl J Med.*  
10 2010;363(24):2339-2350.
- 11 36. Petrie JR, Adler A, Vella S. What to add in with metformin in type 2 diabetes? *QJM.*  
12 2011;104(3):185-192.
- 13 37. Voight BF, Scott LJ, Steinthorsdottir V, et al. Twelve type 2 diabetes susceptibility  
14 loci identified through large-scale association analysis. *Nat Genet.*  
15 2010;42(7):579-589.
- 16 38. Maher JJ, Leon P, Ryan JC. Beyond insulin resistance: Innate immunity in  
17 nonalcoholic steatohepatitis. *Hepatology.* 2008;48(2):670-678.
- 18 39. Lauterbach MA, Wunderlich FT. Macrophage function in obesity-induced  
19 inflammation and insulin resistance. *Pflugers Arch.* 2017;469(3-4):385-396.
- 20 40. Mayoral Monibas R, Johnson AM, Osborn O, Traves PG, Mahata SK. Distinct  
21 Hepatic Macrophage Populations in Lean and Obese Mice. *Front Endocrinol*  
22 *(Lausanne).* 2016;7:152.

- 1 41. Scherer PE. The many secret lives of adipocytes: implications for diabetes.  
2 *Diabetologia*. 2019;62(2):223-232.
- 3 42. Petersen MC, Shulman GI. Mechanisms of Insulin Action and Insulin Resistance.  
4 *Physiol Rev*. 2018;98(4):2133-2223.
- 5 43. Macdonald IA. A review of recent evidence relating to sugars, insulin resistance  
6 and diabetes. *Eur J Nutr*. 2016;55(Suppl 2):17-23.
- 7 44. Musselman LP, Fink JL, Narzinski K, et al. A high-sugar diet produces obesity and  
8 insulin resistance in wild-type *Drosophila*. *Dis Model Mech*. 2011;4(6):842-849.
- 9 45. Weickert MO. Nutritional modulation of insulin resistance. *Scientifica (Cairo)*.  
10 2012;2012:424780.
- 11 46. Williams KJ, Wu X. Imbalanced insulin action in chronic over nutrition: Clinical  
12 harm, molecular mechanisms, and a way forward. *Atherosclerosis*. 2016;247:225-  
13 282.
- 14 47. Zheng S, Xu H, Zhou H, et al. Associations of lipid profiles with insulin resistance  
15 and beta cell function in adults with normal glucose tolerance and different  
16 categories of impaired glucose regulation. *PLoS One*. 2017;12(2):e0172221.
- 17 48. Kong P, Gonzalez-Quesada C, Li N, Cavalera M, Lee DW, Frangogiannis NG.  
18 Thrombospondin-1 regulates adiposity and metabolic dysfunction in diet-induced  
19 obesity enhancing adipose inflammation and stimulating adipocyte proliferation.  
20 *Am J Physiol Endocrinol Metab*. 2013;305(3):E439-450.
- 21 49. Varma V, Yao-Borengasser A, Bodles AM, et al. Thrombospondin-1 is an  
22 adipokine associated with obesity, adipose inflammation, and insulin resistance.  
23 *Diabetes*. 2008;57(2):432-439.

- 1 50. Choe SS, Huh JY, Hwang IJ, Kim JI, Kim JB. Adipose Tissue Remodeling: Its Role  
2 in Energy Metabolism and Metabolic Disorders. *Front Endocrinol (Lausanne)*.  
3 2016;7:30.
- 4 51. Lee MJ, Wu Y, Fried SK. Adipose tissue remodeling in pathophysiology of obesity.  
5 *Curr Opin Clin Nutr Metab Care*. 2010;13(4):371-376.
- 6 52. Bai Y, Sun Q. Macrophage recruitment in obese adipose tissue. *Obes Rev*.  
7 2015;16(2):127-136.
- 8 53. Cinti S, Mitchell G, Barbatelli G, et al. Adipocyte death defines macrophage  
9 localization and function in adipose tissue of obese mice and humans. *J Lipid Res*.  
10 2005;46(11):2347-2355.
- 11 54. Frolova EG, Pluskota E, Krukovets I, et al. Thrombospondin-4 regulates vascular  
12 inflammation and atherogenesis. *Circ Res*. 2010;107(11):1313-1325.
- 13 55. Moura R, Tjwa M, Vandervoort P, Van Kerckhoven S, Holvoet P, Hoylaerts MF.  
14 Thrombospondin-1 deficiency accelerates atherosclerotic plaque maturation in  
15 ApoE<sup>-/-</sup> mice. *Circ Res*. 2008;103(10):1181-1189.
- 16 56. Liu Z, Morgan S, Ren J, et al. Thrombospondin-1 (TSP1) contributes to the  
17 development of vascular inflammation by regulating monocytic cell motility in  
18 mouse models of abdominal aortic aneurysm. *Circ Res*. 2015;117(2):129-141.
- 19 57. Topol EJ, McCarthy J, Gabriel S, et al. Single nucleotide polymorphisms in multiple  
20 novel thrombospondin genes may be associated with familial premature  
21 myocardial infarction. *Circulation*. 2001;104(22):2641-2644.

1 58. Rahman T, Muppala S, Wu J, et al. Effect of Thrombospondin-4 on Pro-  
2 inflammatory Phenotype Differentiation and Apoptosis in Macrophages. *bioRxiv*.  
3 2019.

4 59. Freerman AJ, Johnson AR, Sacks GN, et al. Metabolic reprogramming of  
5 macrophages: glucose transporter 1 (GLUT1)-mediated glucose metabolism  
6 drives a proinflammatory phenotype. *J Biol Chem*. 2014;289(11):7884-7896.

7

*Chow*

*Western diet*

**A**

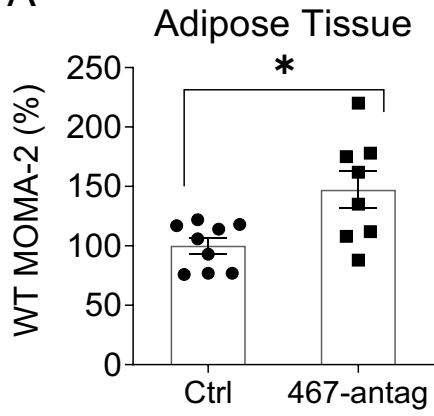

**B**

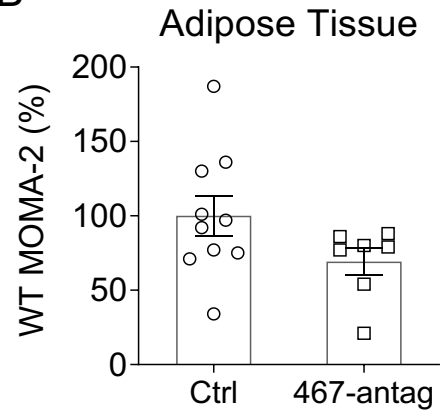

**C**

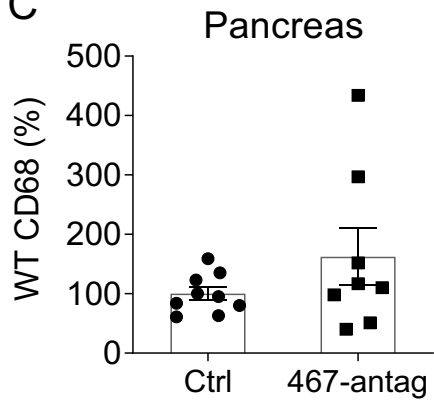

**D**

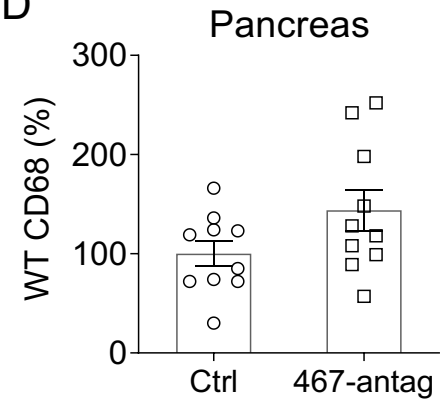

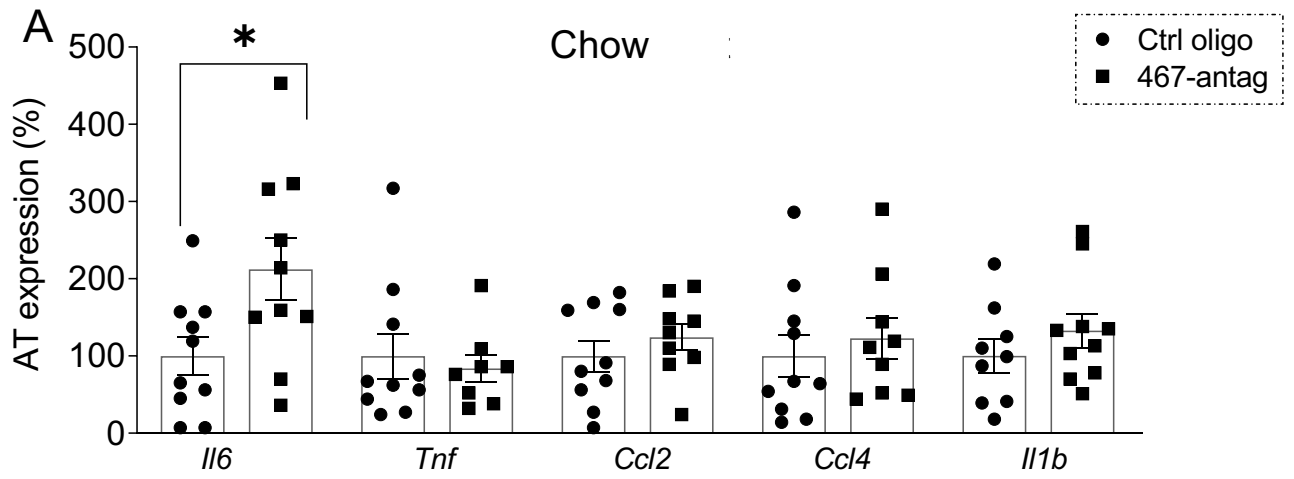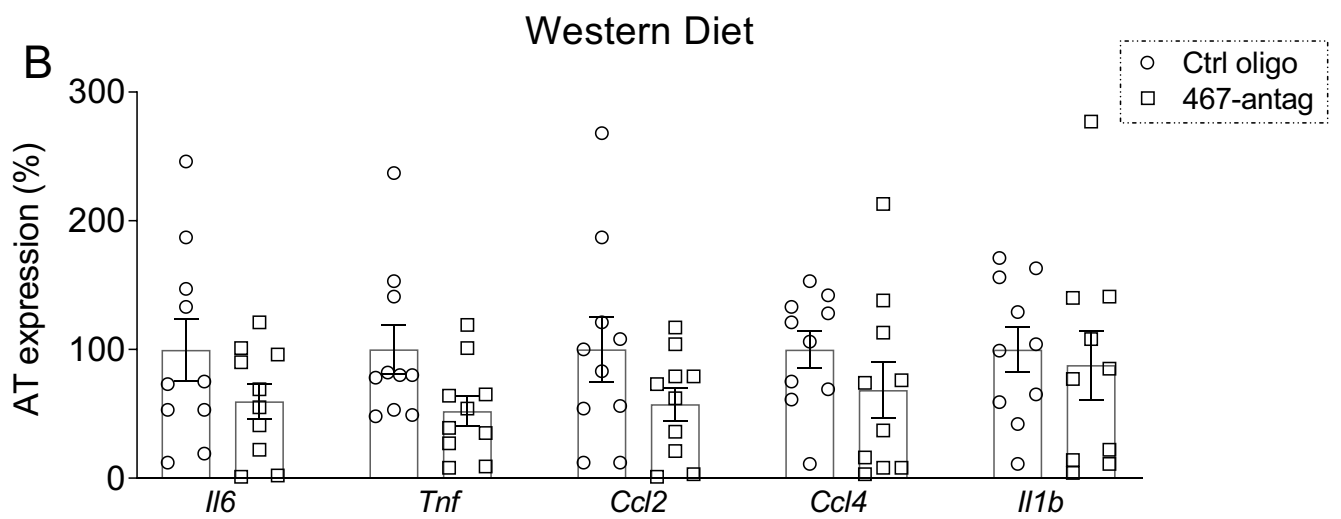

*Chow*

*Western diet*

**A**

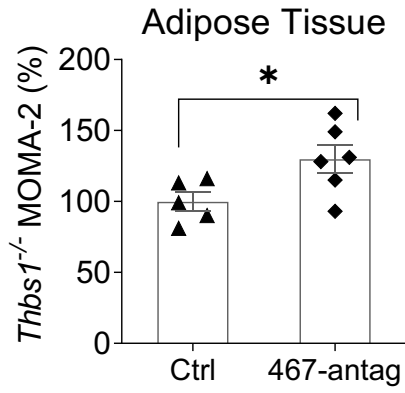

**B**

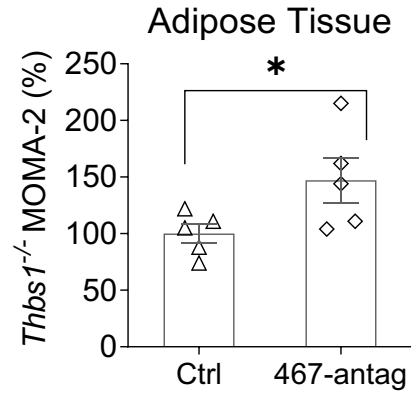

**C**

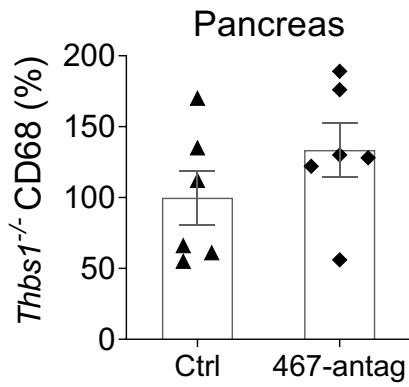

**D**

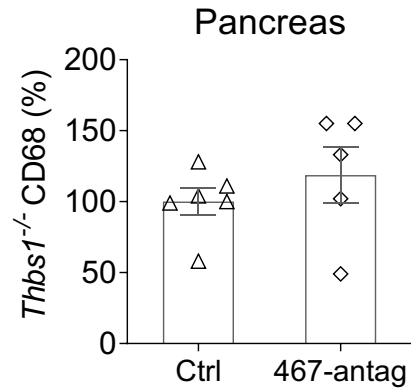

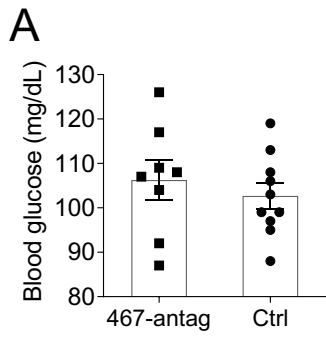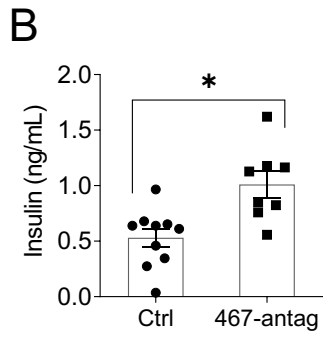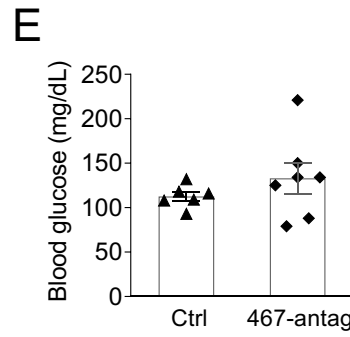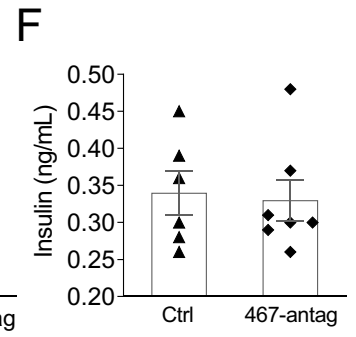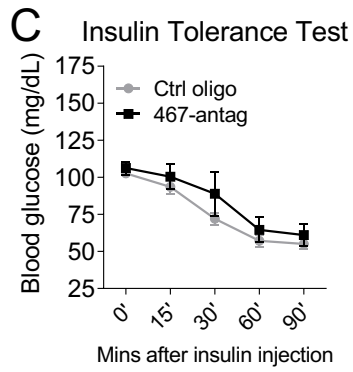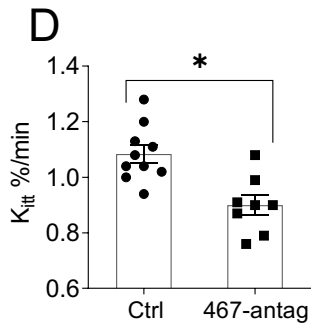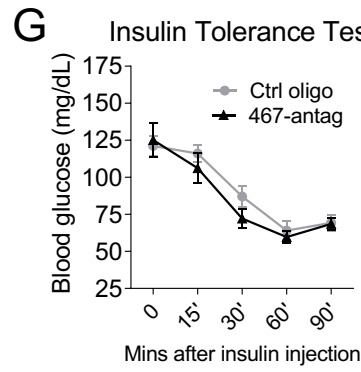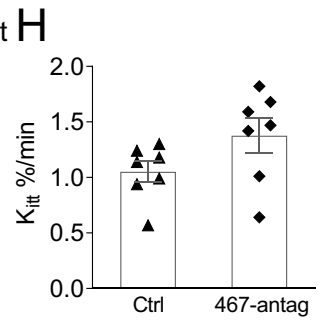



WT mice

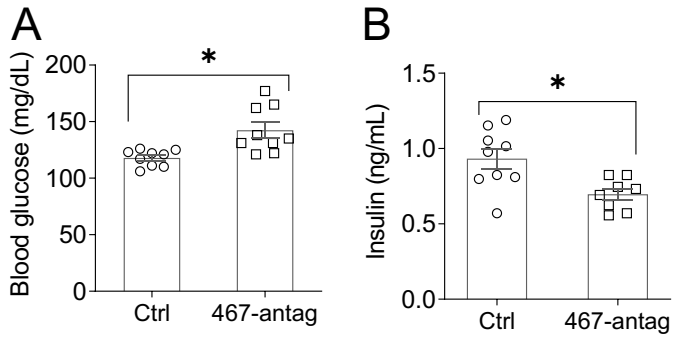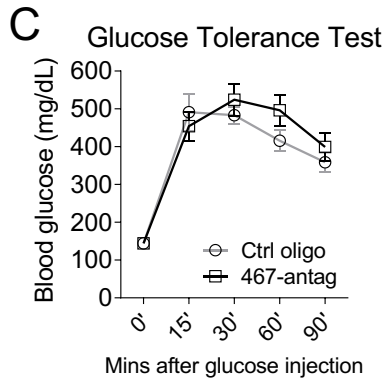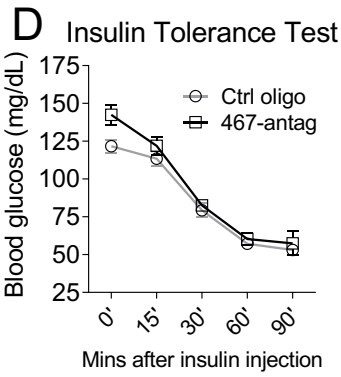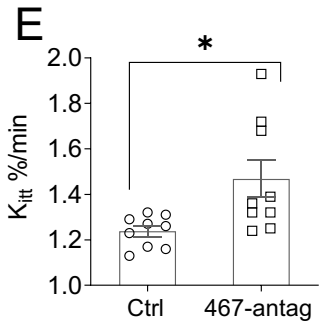

*Thbs1*<sup>-/-</sup> mice

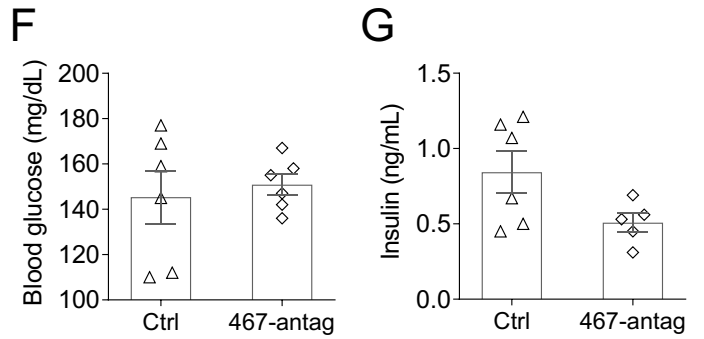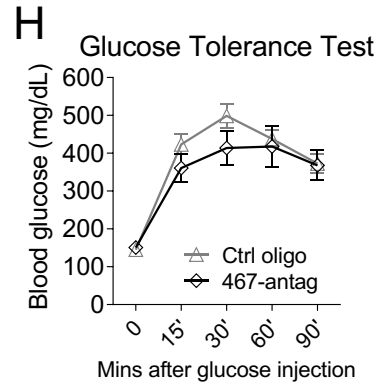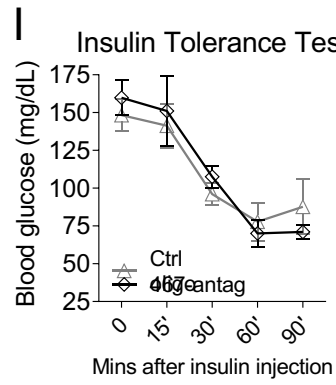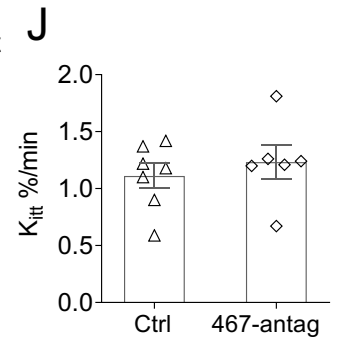

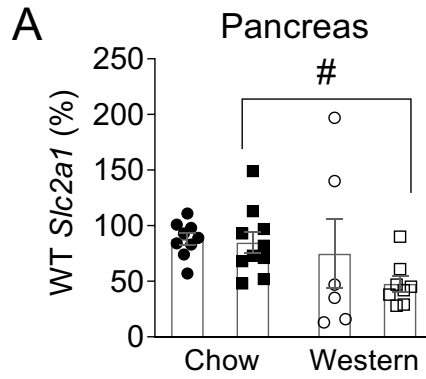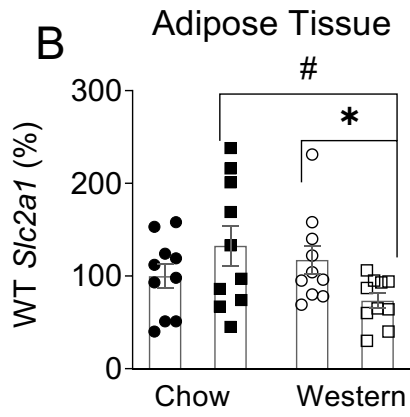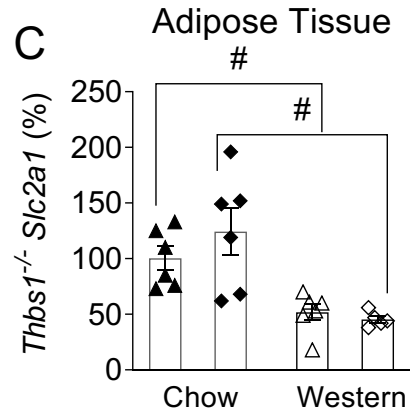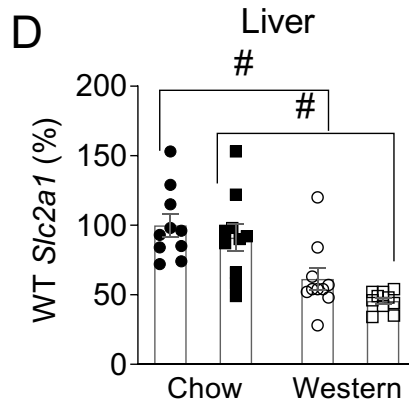

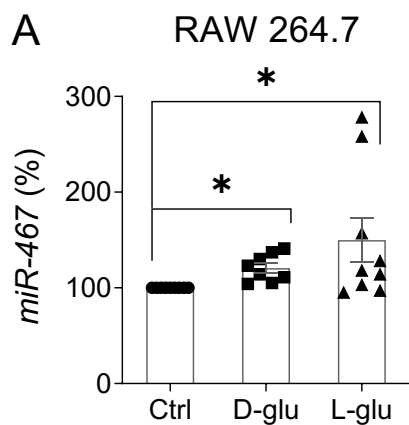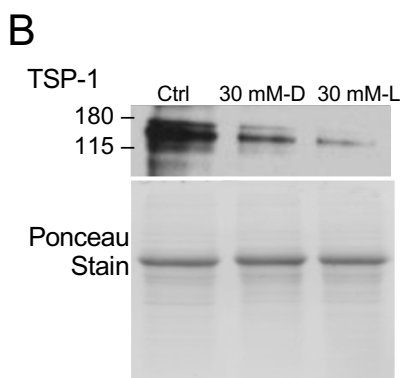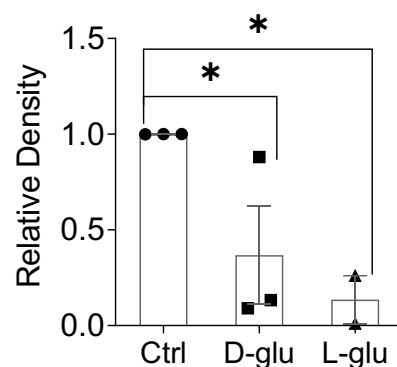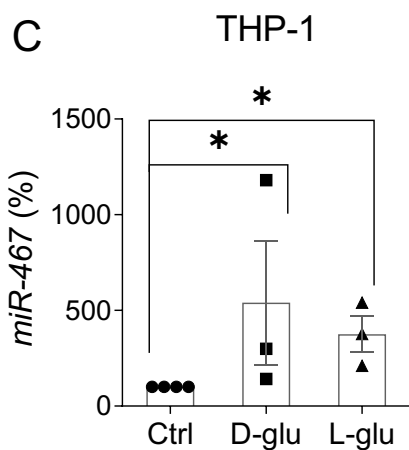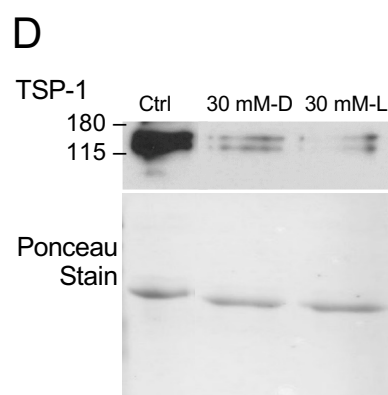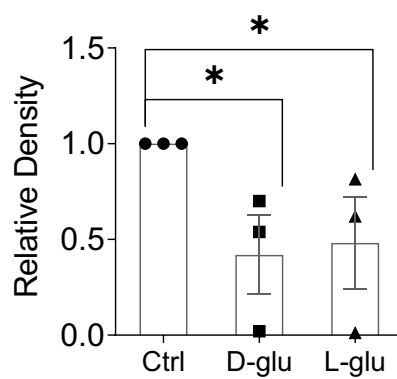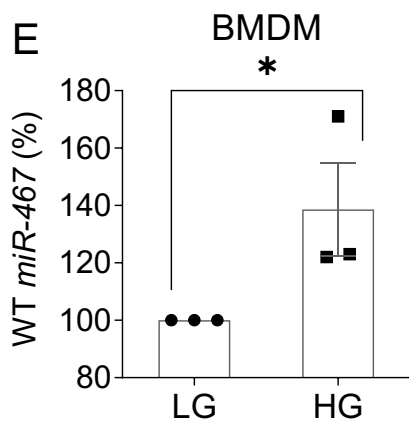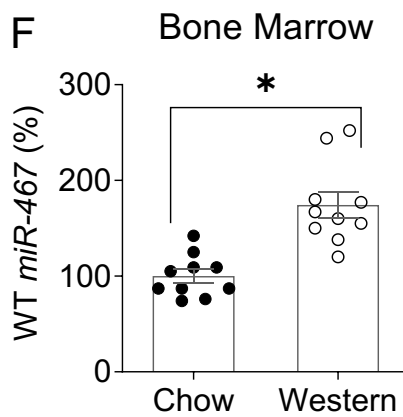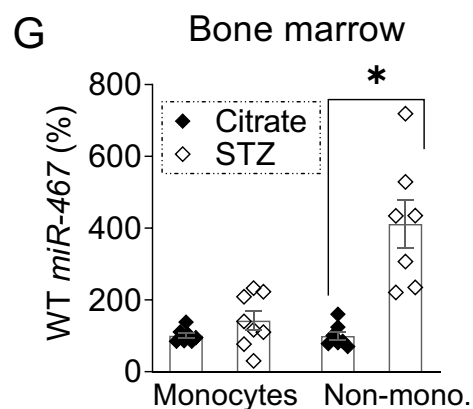

## 1 **2. MATERIALS AND METHODS**

### 2 **2.1 Experimental animals**

3 Animal procedures were approved by the Institutional Animal Care and Use Committee. Up to 5  
4 mice were housed per cage and allowed access to food *ad libitum*. Male WT C57BL6  
5 (n=10/group) or *Thbs1*<sup>-/-</sup> (n=7/group) mice were fed a chow or Western diet (TD.88137, 40-45%  
6 kcal from fat, 34% sucrose by weight, Envigo) starting at 4 weeks of age and injected weekly  
7 with a miR-467a-5p antagonist (2.5 mg/kg body weight) (or a control oligonucleotide that does  
8 not have predicted targets in the mouse and human genomes<sup>22, 28</sup>), intraperitoneally, starting at  
9 5 weeks of age until the end of the experiment. Body weight was measured weekly.

### 10 **2.2 miR-467a-5p mimic and the miR-467a-5p antagonist**

11 The miR-467a-5p mimic and the control oligonucleotide were purchased from Dharmacon.  
12 Cholesterol conjugated miR-467a-5p was modified by tagging a fluorophore (DY547) and a  
13 cholesterol moiety. The custom LNA-modified miR-467a-5p antagonist (TacaTGcaGGcacTTa)  
14 and a control oligonucleotide (TTTaGaccgaGcgTGt) were from Qiagen.

### 15 **2.3 Glucose and insulin tolerance tests (GTT and ITT)**

16 GTT and ITT were administered after overnight fasting. Glucose (2 g/kg body weight) or insulin  
17 (50 µg/kg) (Sigma) were injected intraperitoneally. Blood glucose levels were measured 0 – 180  
18 min after injections using an AlphaTRAK glucometer. The glucose removal rate ( $K_{itt}$ ), expressed  
19 as % / minute, was calculated using the following formula:  $(0.0693/(t_{1/2}) \times 100$ . Plasma glucose  
20 ( $t_{1/2}$ ) was calculated from the slope of the least squares curve analysis during the period when  
21 plasma glucose concentrations decreased linearly, from 0 – 60 min<sup>29,30</sup>.

### 22 **2.4 Induction of diabetes in mice**

23 Male mice were injected intraperitoneally with streptozotocin (STZ, 50 mg/kg, Sigma) for 5  
24 consecutive days. Mice with blood glucose >250 mg/dL were selected for experiments.

## 1 **2.5 Blood cell counts, HDL/LDL cholesterol, and cytokines in blood**

2 Blood was collected by cardiac puncture and circulating blood cell counts were analyzed using  
3 an ADVIA 120 Hematology System (Siemens). Plasma insulin was measured using Insulin  
4 Mouse ELISA kit (Thermo).

5 A custom U-plex Assay Platform (MSD) was used to assess plasma levels of CCL2 (MCP-1),  
6 IL-10, CXCL1, and VEGF-A.

7 HDL and LDL cholesterol were measured using the HDL and LDL/VLDL quantification kit  
8 (BioVision) at end of the experiment.

## 9 **2.6 Immunohistochemical staining**

10 Visceral (omental) adipose tissue and pancreas were fixed in 4% formaldehyde (Electron  
11 Microscopy Sciences) for 24 hours, transferred into 70% ethyl alcohol, and embedded in  
12 paraffin blocks. Two 5  $\mu$ M sections of tissue per animal were stained with Hematoxylin (Ricca),  
13 Eosin (Protocol), Masson's trichrome, or specific antibodies. H&E stained sections of adipose  
14 tissue were analyzed by ERT Imaging (Cleveland, OH) to determine adipocyte sizes.

15 Using VECTASTAIN ABC-HRP Kit (Vector Labs), sections were stained with anti-CD68  
16 (biotinylated clone FA-11, 1:10, AbD Serotec), anti-Insulin (1:100, Dako), MOMA-2 (1:25 AbD  
17 Serotec), anti-vWF (1:400, Dako), anti- $\alpha$ -actin (clone ab5694 1:200, Abcam), or anti-TSP-1 Ab4  
18 (clone 6.1 1:100, Thermo). Secondary antibodies were included in the species-specific kit and  
19 were followed by ImmPACT DAB peroxidase substrate (Vector Labs). Slides were scanned  
20 using Leica SCN400 or Aperio AT2 at 20X magnification. Quantification of positive staining was  
21 performed using Photoshop CS2 (Adobe) or Image Pro Plus (7.0).

## 22 **2.7 Cell culture**

23 RAW264.7, THP-1,  $\beta$ TC6 and 3T3-L1 cells were purchased from ATCC and cultured according  
24 to ATCC directions. THP-1 cells were differentiated in 100 nM PMA (Sigma) for 3 days before

1 glucose stimulation. 3T3-L1 cells were differentiated at 80% confluency with 1 $\mu$ M  
2 Dexamethasone, 0.5 mM IBMX, and 1  $\mu$ g/mL Insulin (all from Sigma).

### 3 **2.8 Isolation of bone marrow-derived macrophages (BMDM)**

4 Bone marrow was collected from femurs and tibia as described in <sup>31</sup>. Macrophages were  
5 differentiated from whole bone marrow using 30 ng/mL MCSF (Biolegend) for 4 days, followed  
6 by 15 ng/mL MCSF for 3 days.

### 7 **2.9 Glucose stimulation of RAW264.7, differentiated THP-1, $\beta$ TC6, and BMDM**

8 Up to 1.0 x10<sup>6</sup> cells were plated in complete media in 6-well plates (Corning). Once glucose  
9 levels reached the fasting level (90 mg/dL) as measured using AlphaTRAK glucometer, cells  
10 were stimulated with 30 mM D-glucose High Glucose, "HG" (Sigma) for 6 hours (RAW 264.7  
11 and BMDM), 3 hours (3T3-L1) or 30 minutes ( $\beta$ TC6).

### 12 **2.10 Transfection of cultured cells**

13 Transfection of the miR-467a-5p antagonist and its control oligo were aided with Oligofectamine  
14 (Invitrogen) for 24 hours. Successful transfection with the cholesterol-modified miR-467a-5p  
15 mimic was confirmed by fluorescence 24 hours post-transfection using an inverted microscope  
16 DMI6000SD (Leica).

### 17 **2.11 Oil Red O Staining**

18 Differentiated 3T3-L1 cells were washed with 1X PBS and fixed in 10% formalin (Electron  
19 Microscopy Sciences) for 15' at room temperature (RT), washed with 60% isopropanol (Sigma),  
20 and stained in the Oil Red O solution for 10' at RT.

### 21 **2.12 RNA Extraction and RT-qPCR**

22 RNA was isolated using Trizol reagent (Thermo). Organs were flash frozen in liquid nitrogen  
23 and homogenized in Trizol. RNA was quantified using Nanodrop 2000 (Thermo).

1 To measure miR-467a-5p expression, 1 – 2.5 µg of total RNA was first polyadenylated using  
2 NCode miRNA First-Strand cDNA Synthesis kit (Invitrogen) or miRNA 1st strand cDNA  
3 synthesis kit (Agilent). Real-time qPCR amplification was performed using SYBR GreenER™  
4 qPCR SuperMix Universal (Thermo) or miRNA QPCR Master Mix (Agilent). The miR-467a-5p  
5 primer (GTA AGT GCC TAT GTA TATG) was purchased from IDT.

6 To measure expression of inflammatory markers, 1 – 2 µg of total RNA was used to synthesize  
7 cDNA using the SuperScript First-Strand cDNA Synthesis System for RT-PCR (Invitrogen).  
8 Real-time qPCR was performed using TaqMan primers for *Tnf*, *Ii6*, *Ccl2*, *Ii1b*, *Ii10*, *Ccl4*, *Cd68*,  
9 *Slc2a1*, *Slc2a2*, *Slc2a4*, *G6pc*, *Fbp1* (Thermo) and TaqMan Fast Advanced Master Mix  
10 (Thermo). Ct values were determined as described previously <sup>32</sup>.

11 β-actin primers (CAT GTA CGT TGC TAT CCA GGC, IDT) were used for normalization by the  
12 the  $2^{-\Delta\Delta Ct}$  method. All samples were assayed in triplicates using a fluorescence-based, real-time  
13 detection method (BioRad MyIQ RT-PCR, Thermo).

### 14 **2.13 Statistical analysis**

15 Data are expressed as the mean value ± Se (standard error). Statistical analysis was performed  
16 using GraphPad Prism 5 Software. Student's t-test and ANOVA were used to determine the  
17 significance of parametric data, and Mann-Whitney test was used for nonparametric data. A *P*-  
18 value of <.05 was considered statistically significant.

19

1 **Supplementary Figure Legends**

2

3 **Figure S1. Representative images of macrophage accumulation markers and tissue**  
4 **structure in WT adipose tissue and pancreas.**

5 Representative images in WT adipose tissue (A, B) or pancreas (C, D) are shown. Adipose  
6 tissue was stained with anti-MOMA-2 antibody (A) or H&E (B). Pancreas was stained with anti-  
7 CD68 antibody (C) or H&E (D). Scale bars at 200 $\mu$ M (MOMA-2 IHC adipose tissue scale bars at  
8 100  $\mu$ M). n=10 mice/group. Arrows show the crown structures.

9

10 **Figure S2. Effect of Western diet on macrophage accumulation in adipose tissue and**  
11 **pancreas in WT mice.**

12 Effects of the Western diet on macrophage accumulation in adipose tissue and pancreas was  
13 determined by (A) anti-MOMA-2 or (B) anti-CD68 in WT mice (injected with the control  
14 oligonucleotide), respectively. In AT, positive staining was normalized to mean adipocyte area  
15 for adipose tissue since adipocyte sizes were changed between groups. n=10 mice/group. Data  
16 are normalized to Chow ctrl diet average staining. \* $P < .05$

17

18 **Figure S3. miR-467 antagonist has no effect on circulating monocytes or WBC in WT or**  
19 ***Thbs1*<sup>-/-</sup> mice.**

20 Whole blood was collected at end point and analyzed on a hematology analyzer to determine  
21 circulating numbers of monocytes and WBCs in WT (A – C) or *Thbs1*<sup>-/-</sup> mice (D – E). #  $P < .05$  vs  
22 chow diet.

23

24 **Figure S4. Adipose tissue inflammation is increased in WT mice on Western diet.**

25 Effect of Western diet on expression of pro-inflammatory markers (*Il6*, *Tnf*, *Ccl2*, *Ccl4*, *Il1b*)  
26 were assessed in whole adipose tissue by RT-qPCR from WT mice injected with control



1 oligonucleotide. Data is normalized to  $\beta$ -actin. Data are relative to Chow ctrl diet average, n=10  
2 mice/group. \* $P$ <.05

3

4 **Figure S5. Effect of Western diet on macrophage accumulation in adipose tissue and**  
5 **pancreas in *Thbs1*<sup>-/-</sup> mice.**

6 Effects of the Western diet on macrophage accumulation in adipose tissue and pancreas was  
7 determined by anti-MOMA-2 (A) or anti-CD68 (B) in *Thbs1*<sup>-/-</sup> mice (injected with the control  
8 oligonucleotide), respectively. In AT, positive staining was normalized to mean adipocyte area  
9 for adipose tissue since adipocyte sizes were changed between groups. n=7 mice/group. Data  
10 are normalized to Chow ctrl diet average staining. \* $P$ <.05

11

12 **Figure S6. Effects of miR-467a-5p antagonist on liver.**

13 RNA from whole liver was extracted at the end of the experiment. Expression of miR-467 (A),  
14 inflammatory markers *Tnf* (B, C), *Il1b* (D, E), or macrophage marker *Cd68* (F, G) were assessed  
15 in WT mice on chow (B, D, F) or Western diet (C, E, G). Data are relative to ctrl oligo average  
16 (to Chow ctrl average in A). n=10 mice/group. \* $P$ <.05 vs ctrl oligo, #  $P$ <.05 vs chow diet

17

18 **Figure S7 Effects of miR-467a-5p antagonist on mouse weight or blood lipid profile in**  
19 **chow-fed WT or *Thbs1*<sup>-/-</sup> mice**

20 Time course for the intraperitoneal glucose tolerance test (GTT) at the end of the experiment in  
21 chow-fed WT (A) or *Thbs1*<sup>-/-</sup> (G) mice. Mouse weight measured at the end of study in WT (B) or  
22 *Thbs1*<sup>-/-</sup> (H) mice. A quantification kit was used to quantify HDL (C, I), LDL (D, J), total  
23 cholesterol (E, K) or free cholesterol (F, L) from serum in WT or *Thbs1*<sup>-/-</sup> mice, respectively.  
24 WT: n=10 mice/group. *Thbs1*<sup>-/-</sup>: n=7 mice/group. \* $P$ <.05

25

1 **Figure S8 Effects of miR-467a-5p antagonist on mouse weight or blood lipid profile in WT**  
2 **or *Thbs1*<sup>-/-</sup> mice on Western diet.**

3 Mouse weight measured at the end of study in WT (A) or *Thbs1*<sup>-/-</sup> (F) mice on a Western diet. A  
4 quantification kit was used to quantify HDL (B, G), LDL (C, H), total cholesterol (D, I) or free  
5 cholesterol (E, J) from serum in WT or *Thbs1*<sup>-/-</sup> mice, respectively. WT: n=10 mice/group.  
6 *Thbs1*<sup>-/-</sup>: n=7 mice/group.

7

8 **Figure S9 Expression of major glucose transporters in pancreas, liver, and adipose**  
9 **tissue.**

10 Expression of the major glucose transporters were measured: *Slc2a2* (Glut2) in pancreas (A)  
11 and liver (B) and *Slc2a4* in AT (C, D). Data are normalized to the chow ctrl average.

12

13 **Figure S10. miR-467 in adipose tissue and the effects of the miR-467 antagonist**  
14 **injections.**

15 (A) miR-467 expression was measured 3 hrs post high glucose (HG) stimulation in cultured  
16 mouse fibroblasts (3T3-L1) differentiated into adipocytes. LG: low glucose control (5 mM D-  
17 glucose). HG: high glucose stimulated (30 mM D-glucose). Data is normalized to LG ctrl  
18 average. n=5 independent replicates. \**P* < .05. (B) Representative phase contrast image of Oil  
19 Red O Staining of 3T3-L1 cells at day 7 post-differentiation. 20x magnification. (C) Expression  
20 of miR-467 in WT C57/BL6 mouse adipose tissue on chow or Western diet for 32 weeks. n=10  
21 mice/group. (D) Quantification of the % positive staining with an anti-TSP-1 antibody. (E) Mean  
22 adipocyte area and perimeter (F) were quantified from H&E-stained sections of adipose tissue.  
23 (G) Quantification of blue color density from Masson's trichrome staining. (H) Representative  
24 images of trichrome staining. Scale bars at 300 μM. # *P* < .05 vs chow diet.

25

26 **Figure S11. miR-467 in pancreas and the effects of the miR-467 antagonist injections.**

1 (A) miR-467 expression was measured 30' post HG stimulation in a cultured mouse  $\beta$  cell line  
2 ( $\beta$ TC6). Data is normalized to LG ctrl average. n=3 independent replicates. LG: low glucose  
3 control (5 mM D-glucose). HG: high glucose stimulated (30 mM D-glucose). \* $P$ <.05 (B)  
4 Expression of miR-467 in C57/BL6 WT mouse pancreas on chow or Western diet for 32 weeks.  
5 n=10 mice/group. (C) Pancreas sections were stained for insulin and counterstained with  
6 hematoxylin. Islet area was quantified as % positive insulin staining over the total area per 100  
7 pixels. Quantification of positive staining in pancreas using an anti-vWF (D), anti- $\alpha$ -actin, (E) or  
8 anti-TSP-1 (F) antibody.

9  
10 **Figure S12. Gluconeogenesis genes in liver from WT mice.**

11 Expression of the gluconeogenesis genes, *G6pc* (A) or *Fbp1* (B) in liver were assessed in WT  
12 mice. Data are normalized to the chow ctrl average. n=10 mice/group. #  $P$ <.05 vs chow diet.

13

14 **Figure S13. miR-467 blocks pro-inflammatory functions of cultured macrophages.**

15 Effect of miR-467 or miR-467 antagonist on expression of pro-inflammatory markers (*Tnf*, *Il6*,  
16 *Ccl2*, and *Ccl4*) were assessed in BMDM from (A, B) WT or (C, D) *Thbs1*<sup>-/-</sup> mice transiently  
17 transfected with miR-467 (A, C) or a miR-467 antagonist (B, D) compared to a control oligo.  
18 RNA was collected 6 hrs post glucose stimulation by RT-qPCR and normalized to  $\beta$ -actin. Data  
19 are relative to the LG control stimulated samples per transfection, n=3 independent replicates.  
20 BMDM: bone marrow-derived macrophages. LG: low glucose control (5 mM D-glucose). HG:  
21 high glucose stimulated (30 mM D-glucose). \* $P$  <.05 compared to LG ctrl. #  $P$  <.05 vs chow diet.

22 (E – H) Plasma from WT or *Thbs1*<sup>-/-</sup> mice, collected at 32 weeks, were assayed by U-plex for  
23 circulating (E) MCP-1, (F) IL-10, (G) CXCL1 and (H) VEGF-A. #  $P$  <.05 vs chow diet.

24

25

Figure S1

Adipose Tissue

*MOMA-2 IHC*

*H&E*

A

B

Control oligo

467-antagonist

Control oligo

467-antagonist

Chow Diet

Western Diet

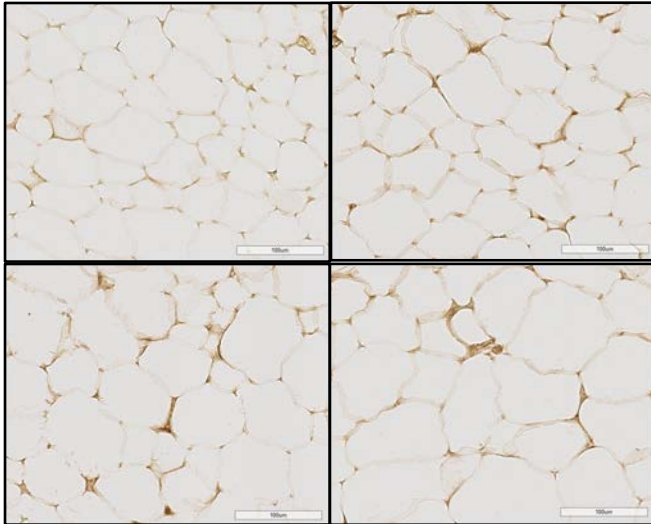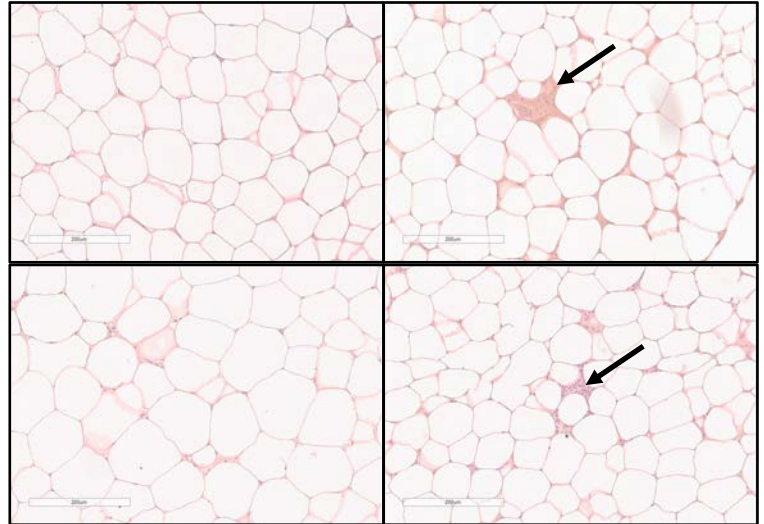

Pancreas

*CD68 IHC*

*H&E*

C

D

Control oligo

467-antagonist

Control oligo

467-antagonist

Chow Diet

Western Diet

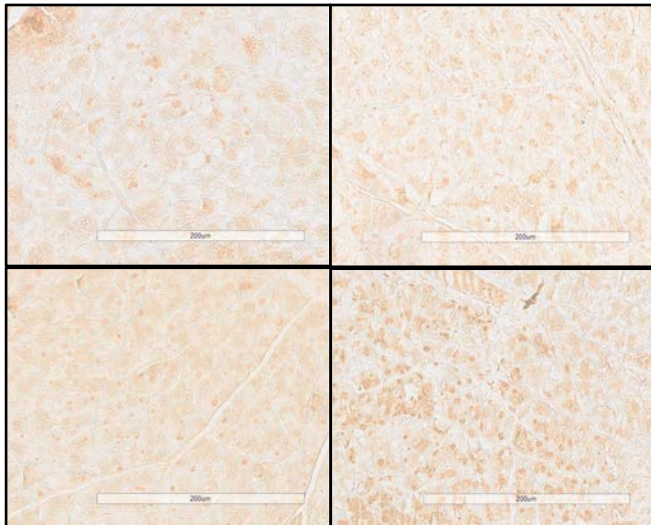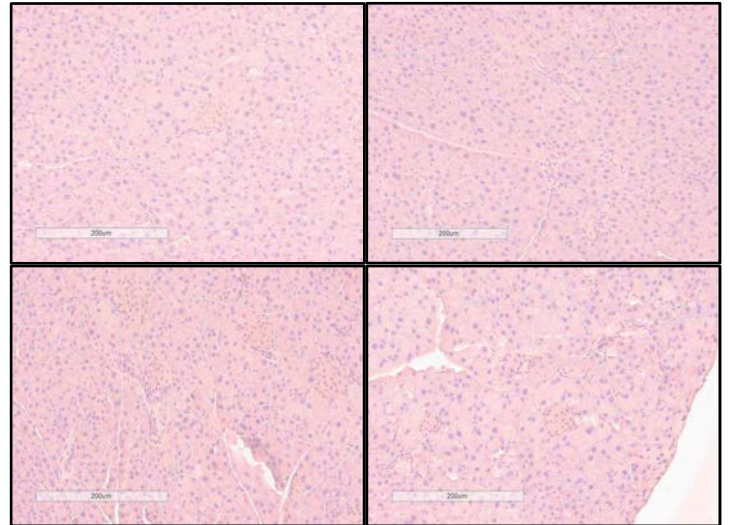

Figure S2

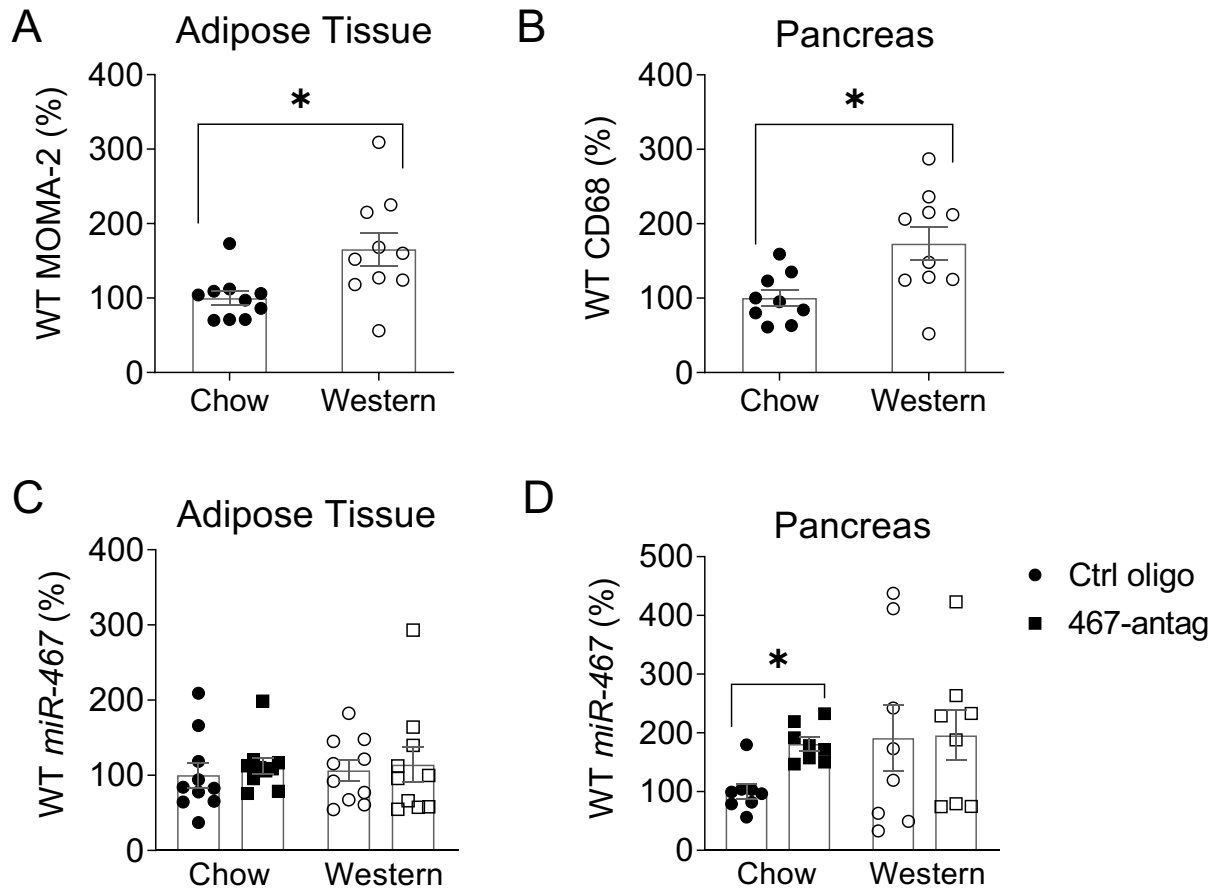



Figure S4

Control oligo

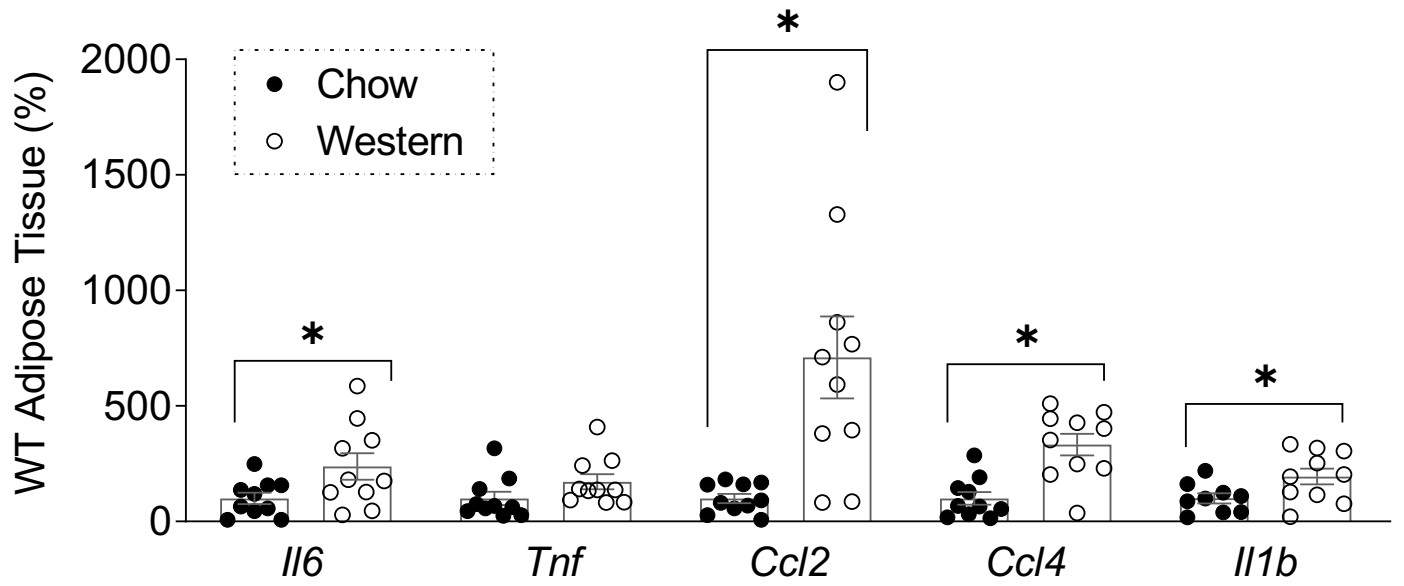

Figure S5

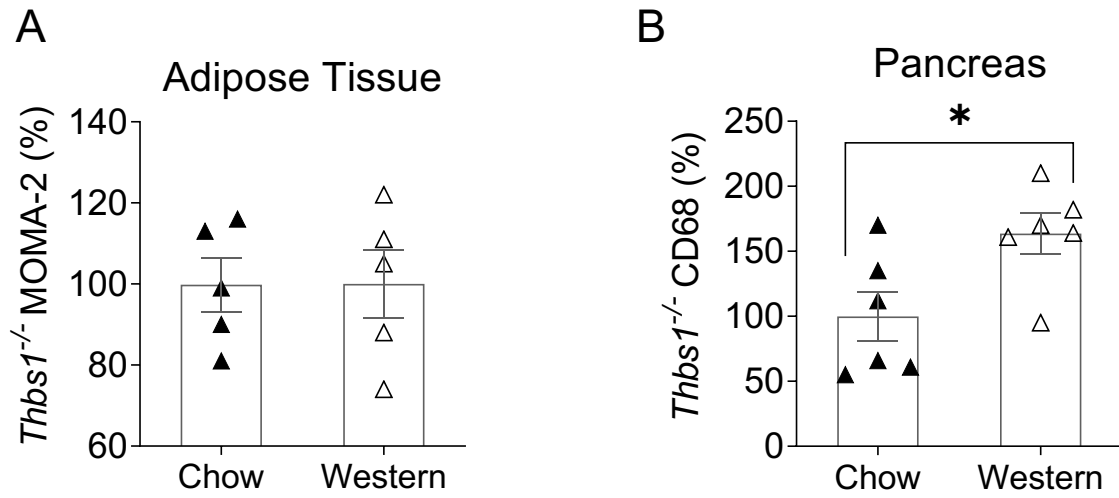



Figure S6

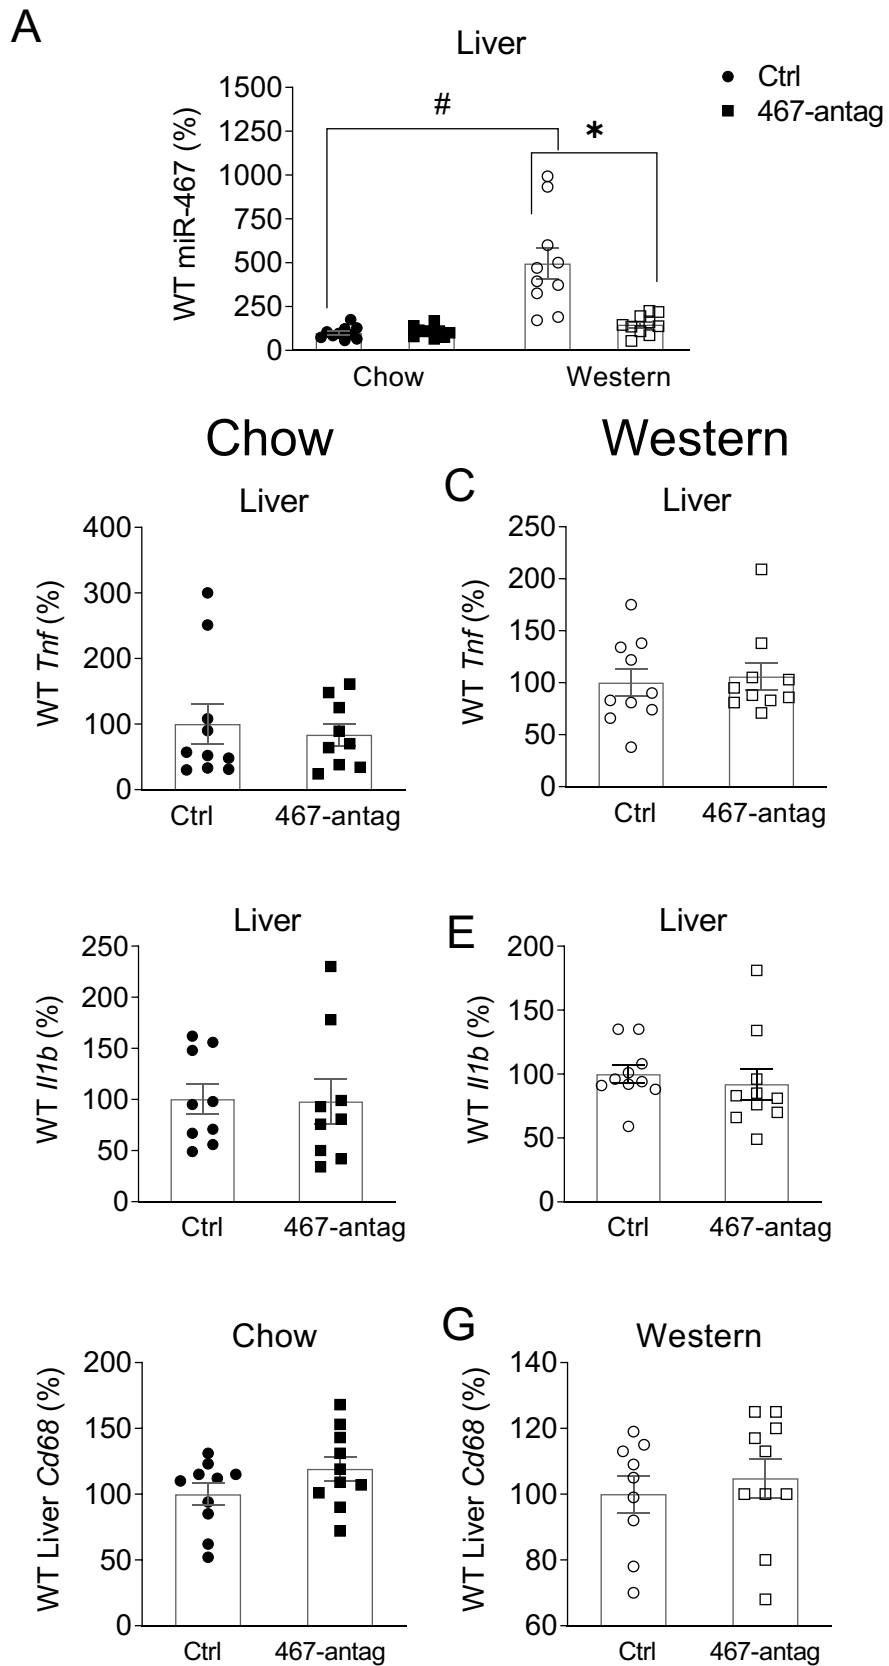

Figure S7

WT mice, chow

*Thbs1*<sup>-/-</sup> mice, chow

**A** Glucose Tolerance Test

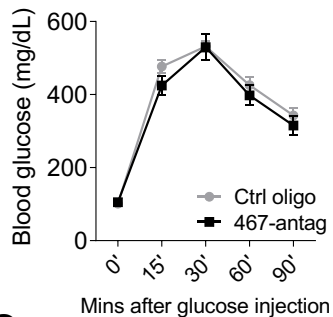

**B**

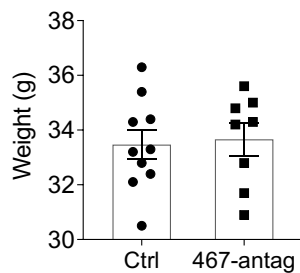

**G** Glucose Tolerance Test

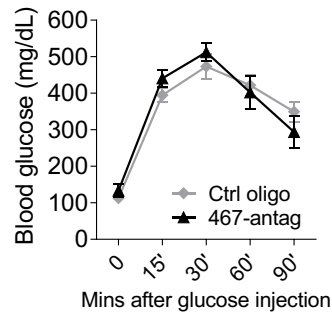

**H**

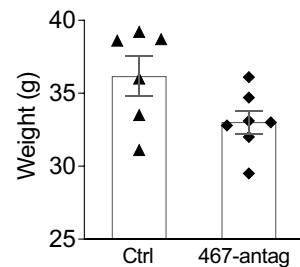

**C**

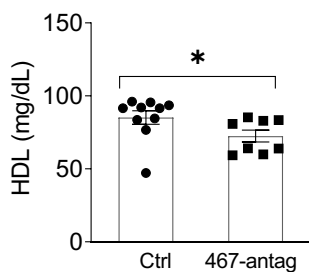

**D**

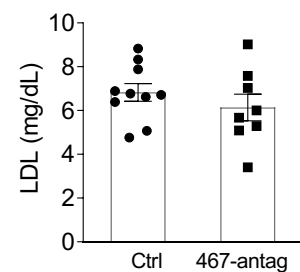

**I**

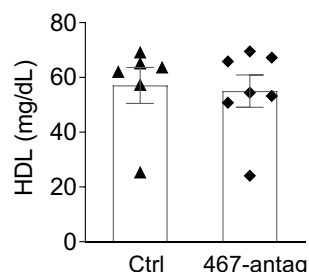

**J**

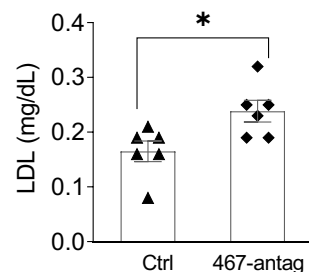

**E**

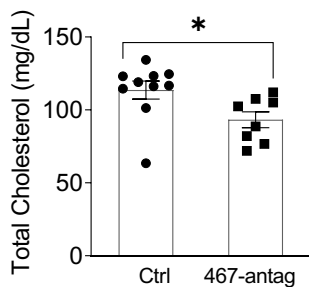

**F**

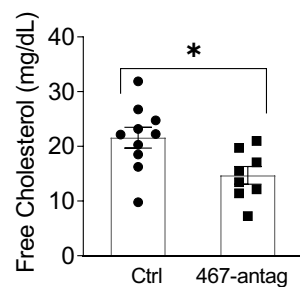

**K**

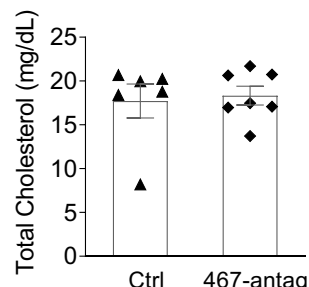

**L**

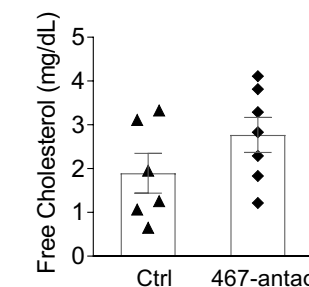

Figure S8

WT mice, Western diet

*Thbs1*<sup>-/-</sup> mice, Western diet

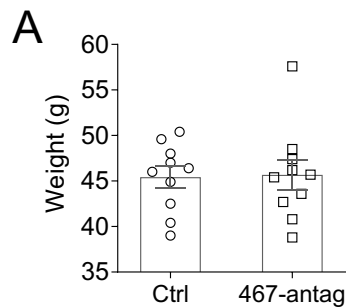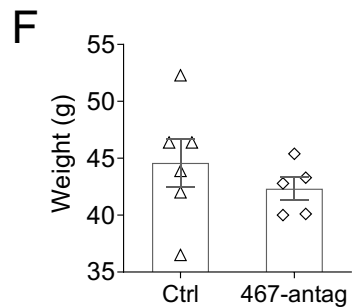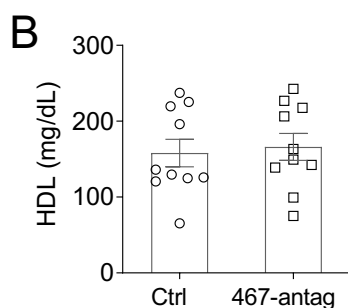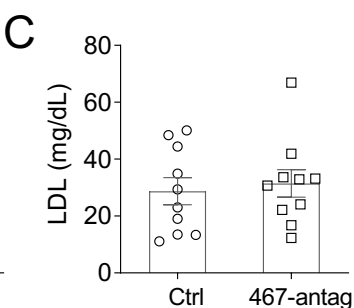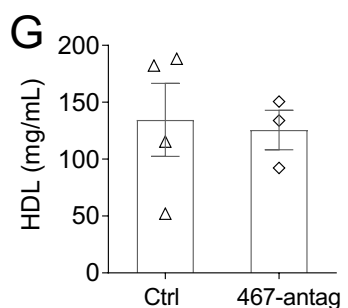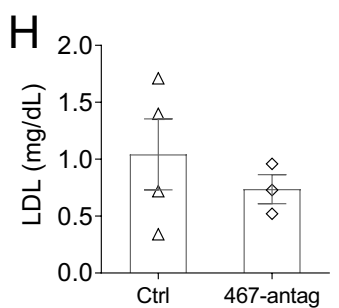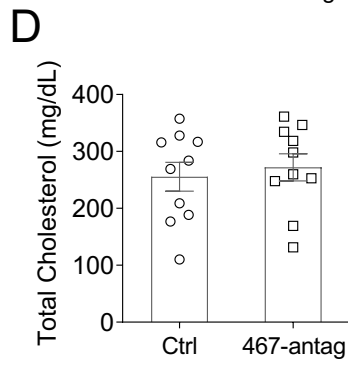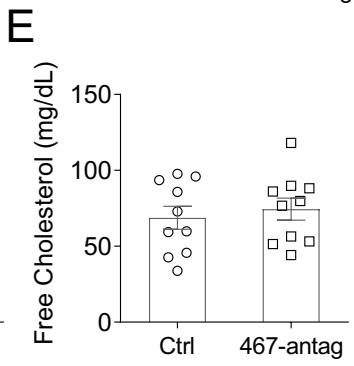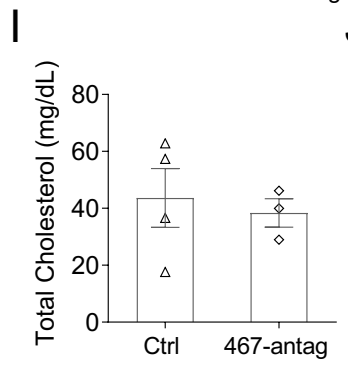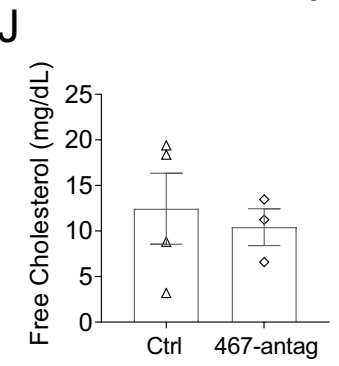

Figure S9 Major Glucose Transporters

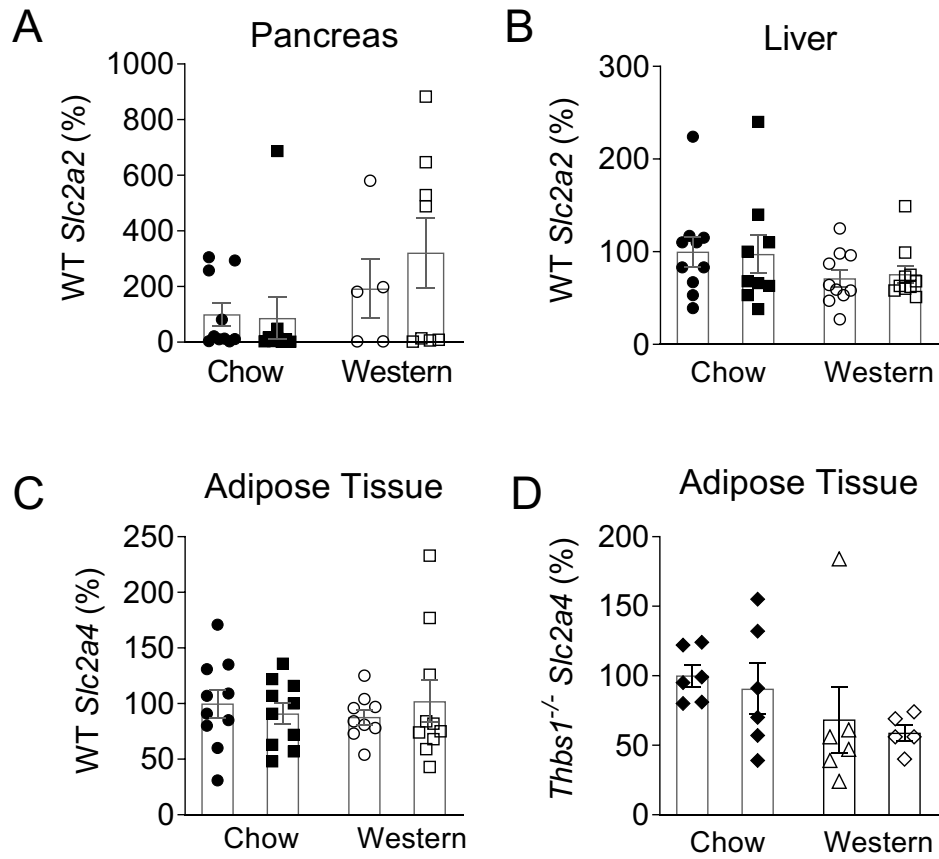

Figure S10

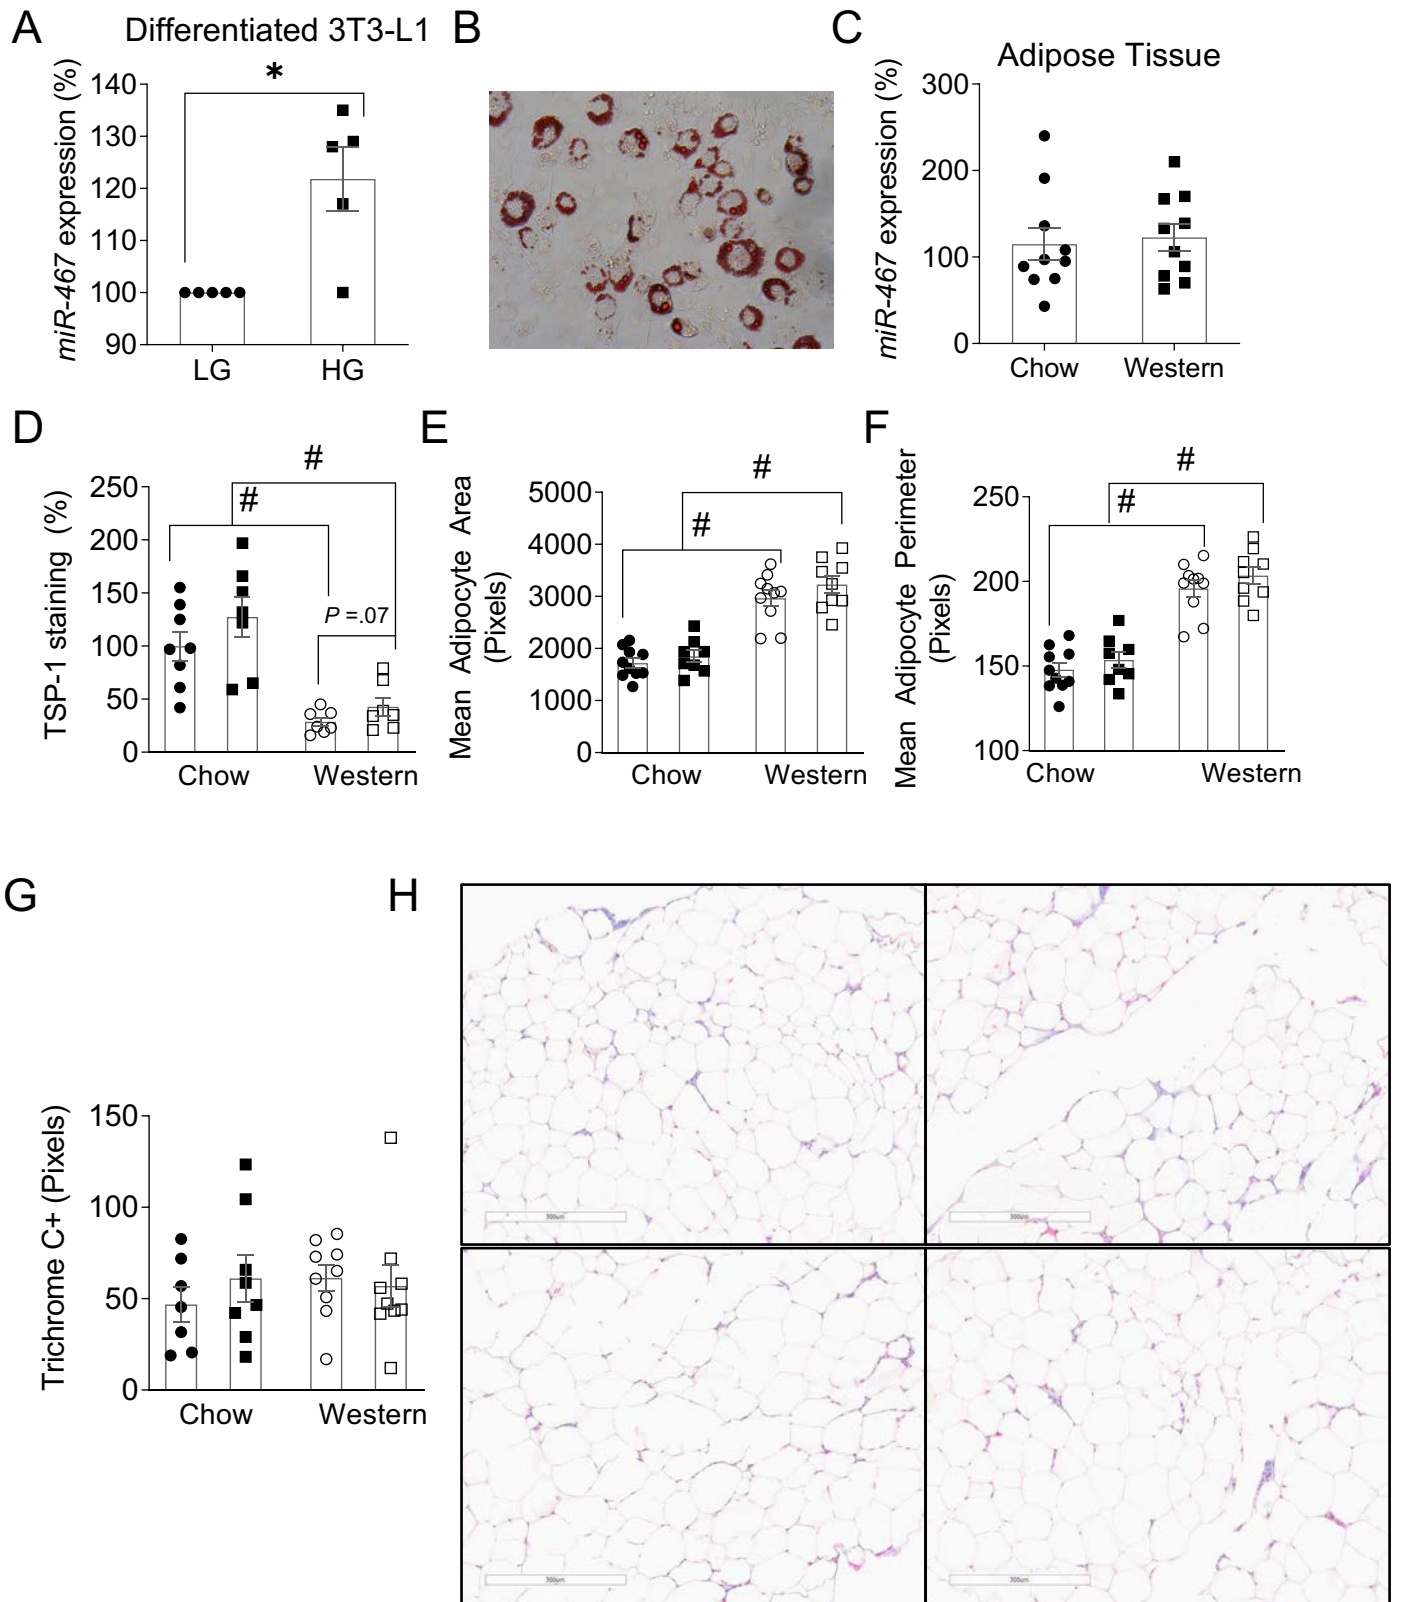

Figure S11

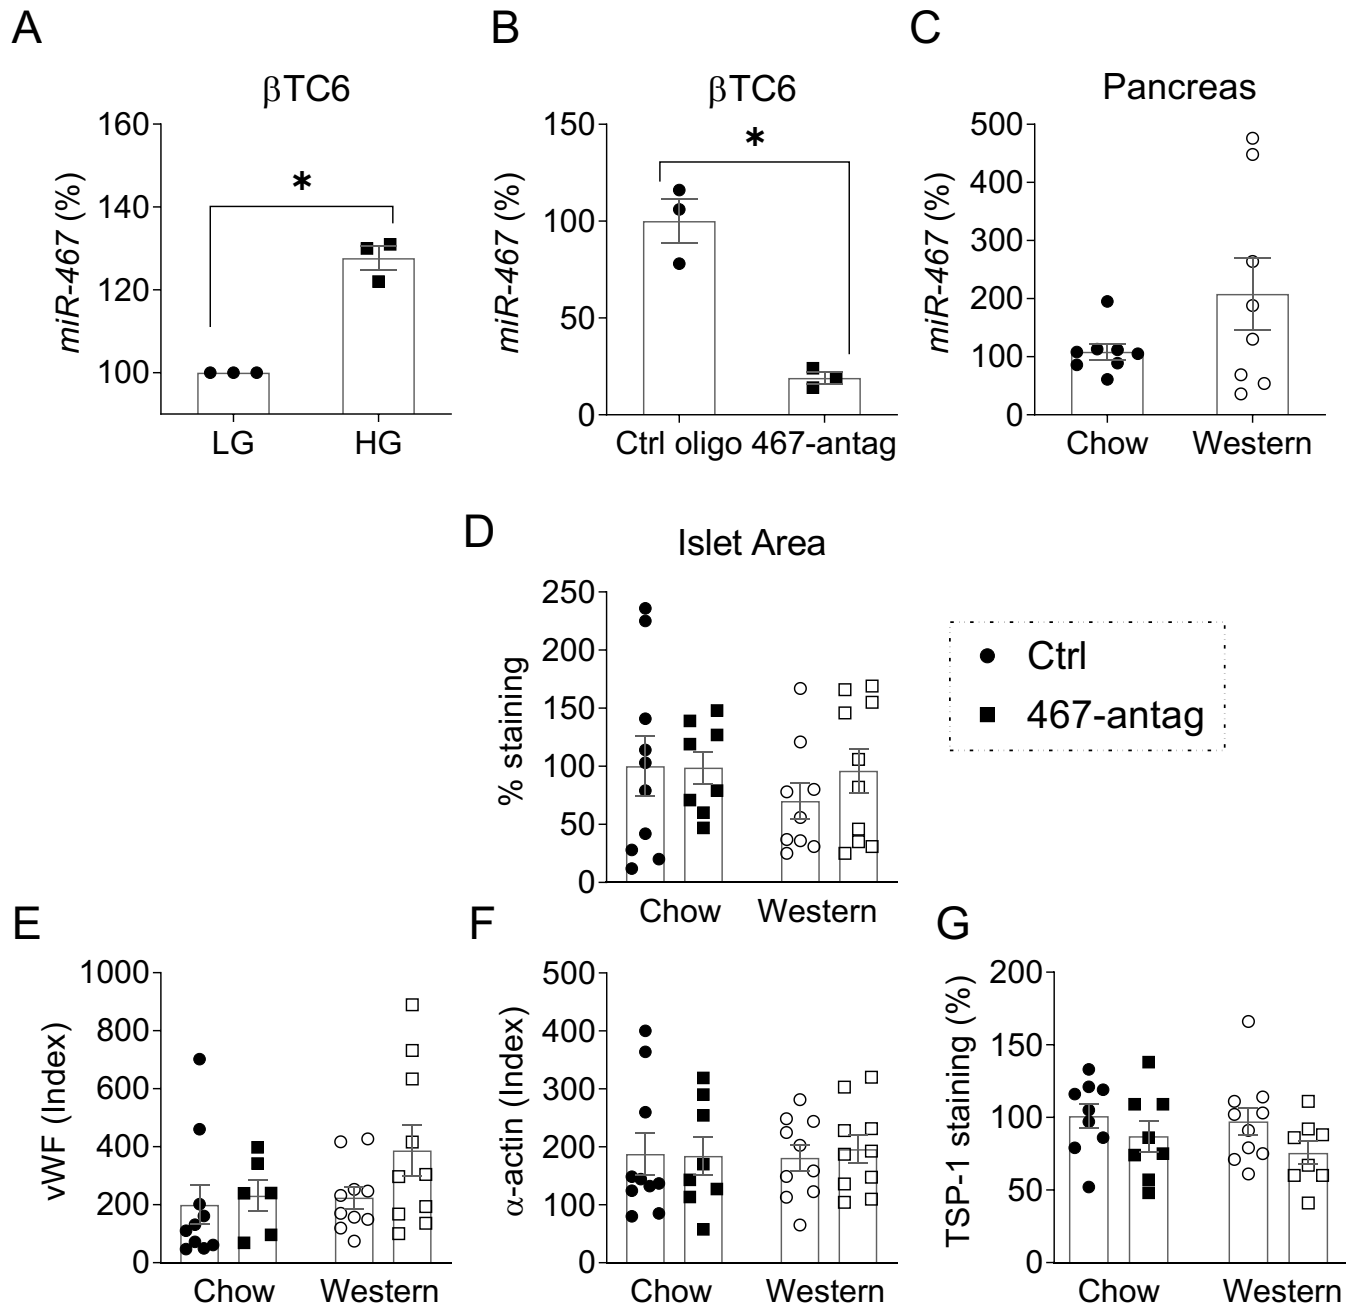

Figure S12 Gluconeogenesis Genes in WT Liver

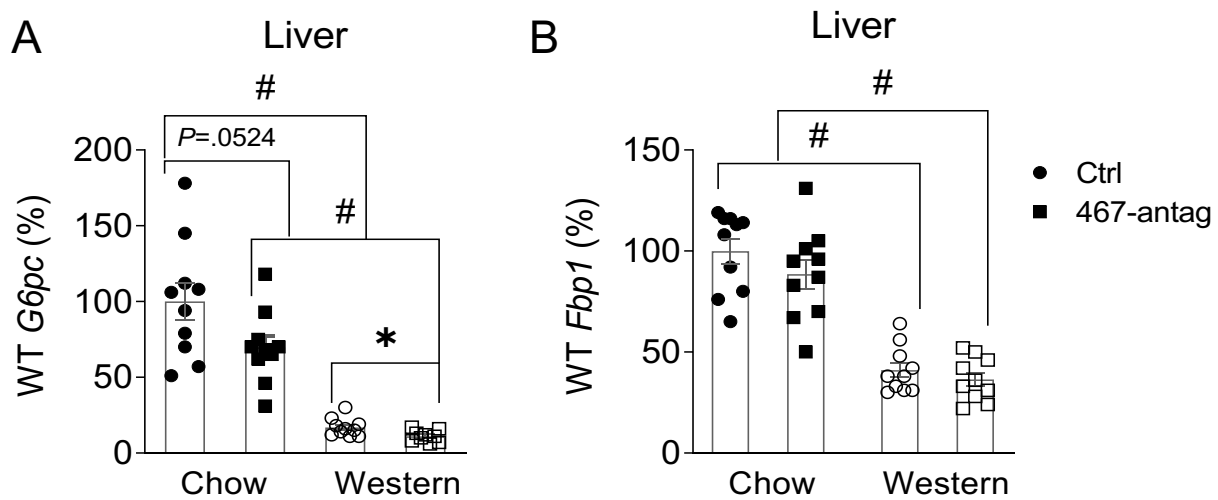

Figure S13

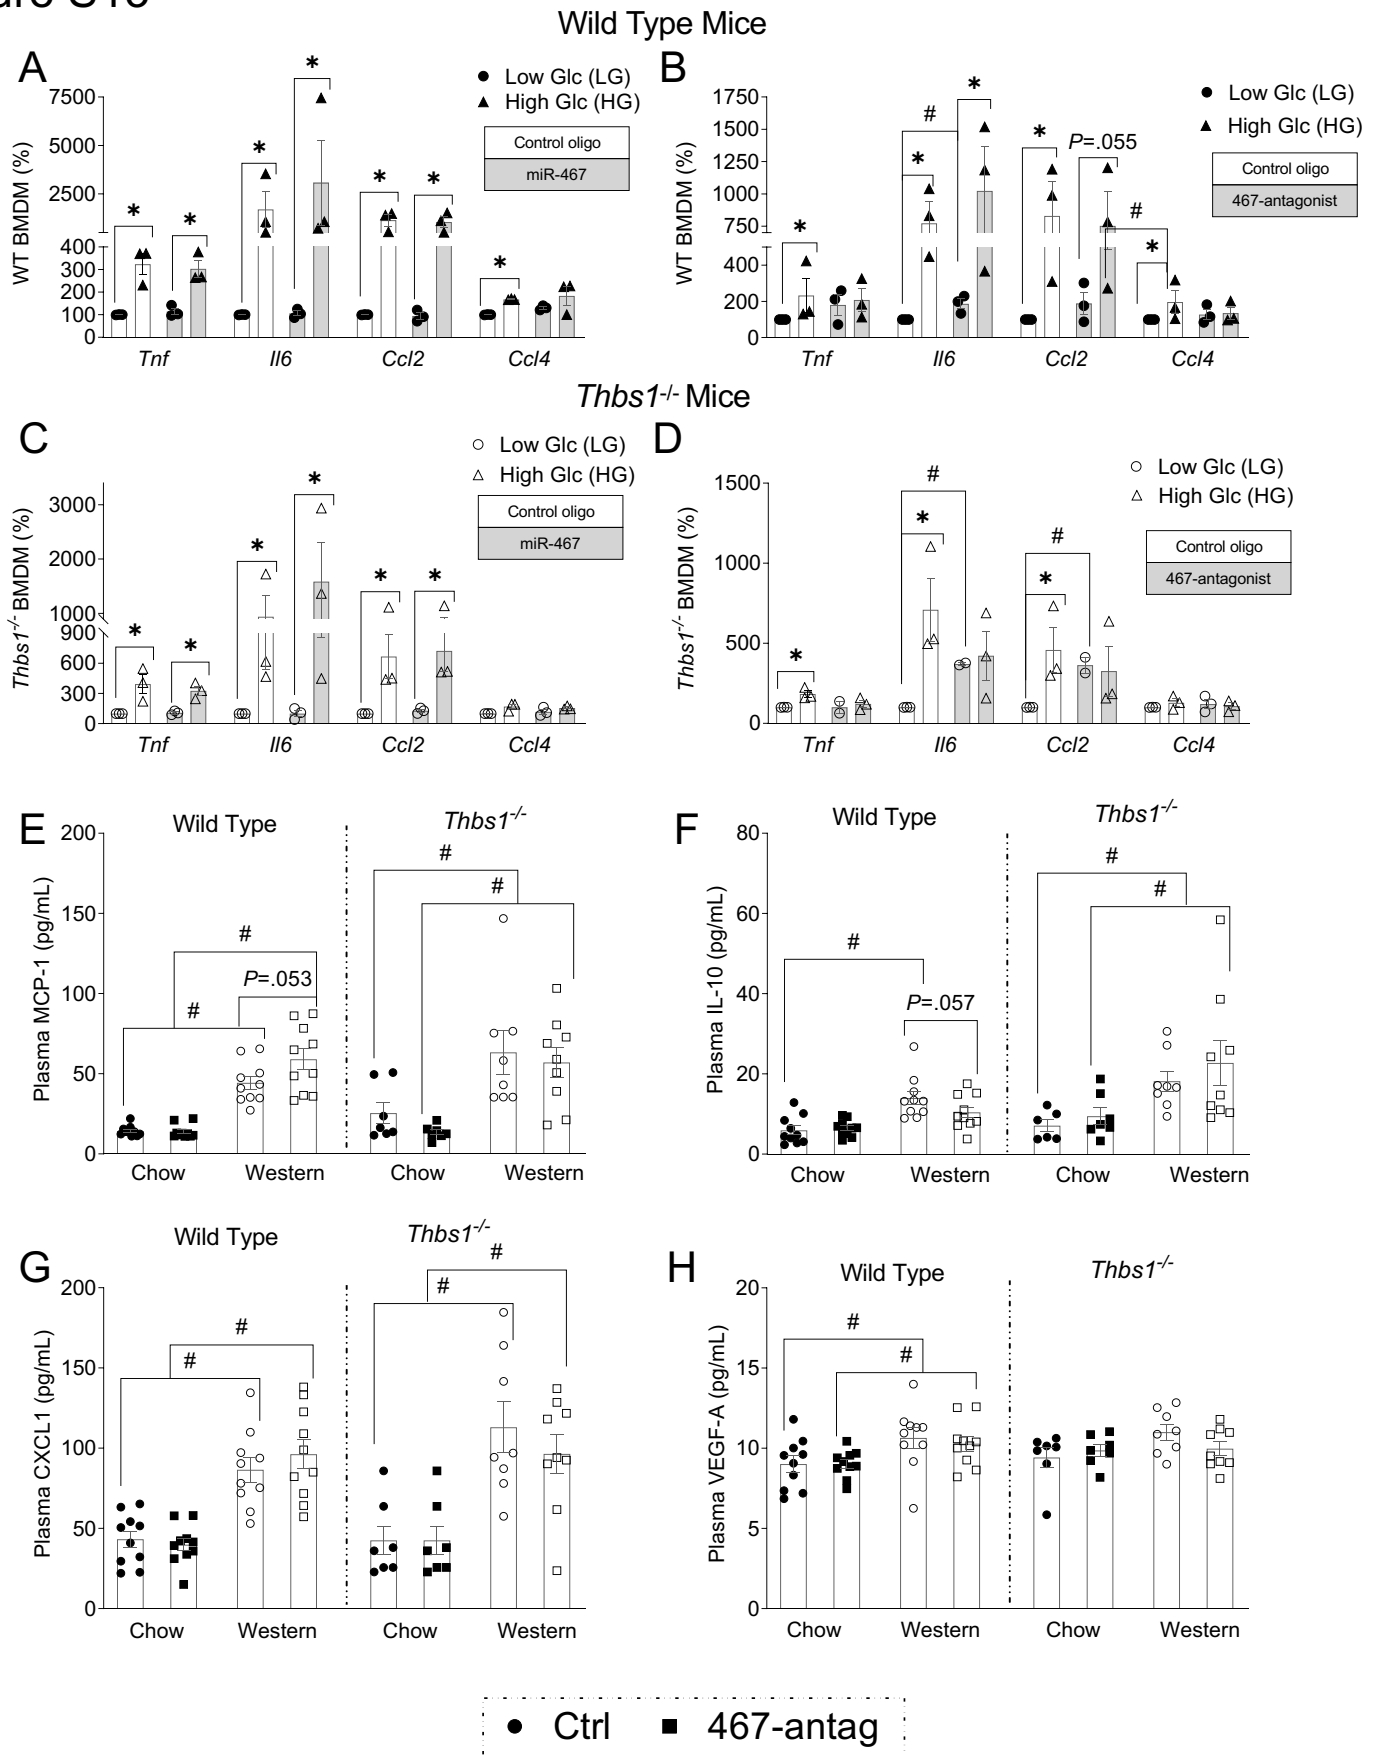

Source: https://www.biorxiv.org/content/biorxiv/early/2020/12/14/666545.full.pdf
